1 **Force-dependent remodeling of a tight junction protein ZO-1 is regulated by phase**  
2 **separation**

3

4 Noriyuki Kinoshita\*<sup>1,3</sup>, Takamasa S. Yamamoto<sup>1</sup>, Naoko Yasue<sup>1</sup>, Toshihiko Fujimori<sup>2,3</sup>,  
5 and Naoto Ueno\*<sup>1,3,4</sup>

6

7

8

9

10

11 1: Division of Morphogenesis, Department of Developmental Biology, National Institute  
12 for Basic Biology, 38 Nishigonaka, Myodaiji, Okazaki, Aichi, 444-8585, Japan.

13

14 2: Division of Embryogenesis, Department of Developmental Biology, National Institute  
15 for Basic Biology, 5-1 Higashiyama, Myodaiji, Okazaki, Aichi 444-8787, Japan

16

17 3: School of Life Science, SOKENDAI (The Graduate University for Advanced Studies),  
18 Okazaki, Aichi, 444-8585, Japan

19

20

21

22 4: Lead Contact

23

24 \* corresponding authors:

25 [nueno@nibb.ac.jp](mailto:nueno@nibb.ac.jp) (N.U.), [nkinoshi@nibb.ac.jp](mailto:nkinoshi@nibb.ac.jp) (N.K.)

26

27 **Summary**

28 Although the physiological importance of biomolecular condensates is widely recognized,  
29 how it is controlled in time and space during development is largely unknown. Here we  
30 show that a tight junction protein ZO-1 forms cytoplasmic condensates in the  
31 trophectoderm (TE) of the mouse embryo before E4.0. These disappear via dissolution,  
32 and ZO-1 accumulates at the cell junction as the blastocyst cavity grows, and internal  
33 pressure on TE cells increases. In contrast, the dissolution is less evident in TE cells  
34 attached to the inner cell mass, as they receive weaker tensile forces. Furthermore,  
35 analyses using MDCK cells have shown that the ZO-1 condensates are generated and  
36 maintained by liquid-liquid phase separation. Our study also highlights that the dynamics  
37 of these condensates depends on the physical environment via the interaction between  
38 ZO-1 and F-actin. We propose that the force-dependent regulation of ZO-1 condensation  
39 contributes to establishing robust cell-cell adhesion during early development.

40

41 **Keywords**

42 Cell-to-cell adhesion, ZO-1, tight junction, mechanical force, mouse development,  
43 condensate, liquid-liquid phase separation (LLPS), intrinsically disordered region (IDR).

44

45

## 46 **Introduction**

47 Mechanical forces are generated at different times and in different tissues during the  
48 development of organisms, due to the dynamic movement and shape change of cells and  
49 tissues (Bodor et al., 2020), growth of a cell mass by proliferation (Godard and  
50 Heisenberg, 2019), the removal of cells by apoptosis (Teng et al., 2017), luminal pressure  
51 (Chan et al., 2019), and shear stress of body fluids such as blood (Paolini and Abdelilah-  
52 Seyfried, 2018), etc. All of these forces can contribute to the morphogenesis of organs  
53 through mechanochemical feedback mechanisms (Hannezo and Heisenberg, 2019).  
54 Although the presence and physiological importance of such forces have long been  
55 implicated in the homeostasis as well as morphogenesis of living organisms (Hallou and  
56 Brunet, 2020; Thompson, 1917), how cells sense and respond to these forces are not fully  
57 understood at the molecular level. In this study, we demonstrate that the remodeling of  
58 ZO-1 through the regulation of liquid-liquid phase separation (LLPS) is mechanically  
59 controlled.

60 In our previous study using *Xenopus laevis* embryos, we demonstrated that among a  
61 number of identified phosphoproteins, cell junction- as well as focal adhesion-related  
62 proteins are highly phosphorylated immediately after the application of mechanical forces  
63 by centrifugation or compression (Hashimoto et al., 2019). Intriguingly, a global analysis  
64 of the phosphoproteome suggested that the mechanical stimuli induced the embryonic  
65 cells to adopt an epithelial state rather than a mesenchymal state, known as the  
66 mesenchymal-epithelial transition (MET), which is opposite to the epithelial-  
67 mesenchymal transition (EMT), a well-characterized phenomenon in some  
68 developmental contexts and in cancer pathogenesis in which cells compromise their cell-  
69 to-cell adhesiveness (Baum et al., 2008). In fact, we confirmed that adherens- and tight  
70 junction, revealed by the accumulation of C-cadherin (Choi et al., 1990; Ginsberg et al.,  
71 1991) and ZO-1 (Anderson et al., 1988), respectively, became enhanced after the  
72 application of force. We also found that F-actin, which is normally localized in the basal  
73 and lateral domain of cells, accumulated at the apical domain, reinforcing the stiffness of  
74 the cell cortex (Hashimoto et al., 2019). These observations suggest that these junctions  
75 were remodeled following the force stimuli and that the cells adopted more epithelialized  
76 states. This led us to propose that force-induced epithelialization is an important cellular  
77 response to physical forces to maintain the integrity of a tissue, allowing it to acquire  
78 robustness against forces which might perturb normal morphogenesis.

79 More recently, we showed that FGFR1 is activated, and that Erk2 is consequently  
80 phosphorylated and translocated into the nucleus in ectodermal cells (Kinoshita et al.,  
81 2020) to achieve MET during gastrulation. During the course of that study, we repeatedly  
82 observed that ZO-1 condensates were found as puncta in ectoderm cells prior to, but not  
83 after, gastrulation (Kinoshita et al., 2020). Based on previous reports that showed that  
84 ZO-1 can undergo LLPS in zebrafish embryos (Schwayer et al., 2019) and cultured cells  
85 (Beutel et al., 2019), we speculated that the ZO-1 LLPS is mechanically regulated,  
86 particularly by dynamic morphogenesis known as epiboly during gastrulation which  
87 imposes a tensile force on the ectoderm (Hernandez-Vega et al., 2017).

88 To extend the above study that employed *Xenopus laevis*, and to examine whether our  
89 working model could be extrapolated to other species such as mammals, we focused on  
90 mouse embryogenesis in this study. Basically, we obtained similar results to those with  
91 *Xenopus* and found that cytoplasmic condensates of ZO-1 exist in the trophectoderm (TE)  
92 cells of early mouse embryos before E4.0, although the condensate disappears upon  
93 stretching of TE cells due to the expansion of the blastocyst cavity (blastocoel).

94 To confirm that ZO-1 condensates are the product of cellular LLPS, a physical process to  
95 facilitate the demixing of proteins through protein condensation (Brangwynne, 2013), we  
96 used on cultured cells in which condensates of GFP-ZO-1 were observed in various  
97 conditions. Following both the treatment of a cell-permeabilizing agent digitonin (Shiina,  
98 2019), and analyses with fluorescent recovery after photobleaching (FRAP), ZO-1  
99 condensates have been shown to have typical properties of liquid droplets generated by  
100 LLPS. We also identified that the N-terminal fragment of ZO-1, which contains  
101 intrinsically disordered regions (IDRs) (Kato et al., 2012; Li et al., 2012), an unstructured  
102 stretch of an amino acid sequence of low complexity, are sufficient for phase separation  
103 of ZO-1. Finally, we highlighted the importance of cytoskeletal actin in the regulation of  
104 ZO-1 assembly and propose that ZO-1 protein became liberated from the droplets and  
105 was deployed to enhance the tight junction in a force-dependent manner. This was  
106 supported by observations of MDCK cells in different culture conditions, including  
107 wound healing.

108 The present study, which used early mouse embryos and cultured cells, reveals a  
109 previously unknown role of physical force that regulates the condensation of ZO-1 and  
110 contributes to the enhancement of cell-to-cell adhesion during early development.

111

## 112 **Results**

### 113 ***ZO-1 condensates in early mouse embryos***

114 To examine whether the behavior of ZO-1 protein in *Xenopus laevis* embryos which we  
115 reported previously (Kinoshita et al., 2020) is conserved across species, especially in  
116 mammals, we first performed immunostaining of ZO-1. We focused on E3.5 and E4.5  
117 embryos since they hatch out of the zona pellucida (ZP) and expand their shape (Figure  
118 1A). We fixed E3.5 and E4.5 embryos with paraformaldehyde and immunostained with a  
119 ZO-1 antibody (Figure 1B). We found that the cells of E3.5 embryos showed a  
120 significantly higher number of ZO-1 puncta in the cytoplasm relative to E4.5 embryos.  
121 As development proceeded, the surface area of TE cells, particularly on the mural side,  
122 expanded (Figure 1E) and became thinner (data not shown). We found that the number of  
123 cytoplasmic ZO-1 puncta were reduced and ZO-1 signal intensity at the plasma  
124 membrane in E4.5 embryos became much higher than those of E3.5 embryos at the  
125 expense of its cytoplasmic pool (Figure 1C, D mural), without changing the total  
126 fluorescence intensity of the protein (Figure 1F left). Importantly, this change coincides  
127 well with the accumulation of F-actin at the cell cortex in E4.5 embryos (Figure 1B and  
128 1F right). This result suggests that the shuttling of ZO-1 protein from the cytoplasmic  
129 puncta to cell junctions occurs as development progressed. We observed a similar  
130 behavior of ZO-1 protein using ZO-1-EGFP-expressing mouse embryos by live-imaging  
131 (Katsunuma et al., 2016) (Video S1 and Figure S1).

132 Interestingly, however, in the polar TE cells attached to the inner cell mass (ICM) of  
133 E4.5 embryos, a significant number of condensates remained in the cytoplasm (lower  
134 panels in Figure 1B lower and Figure 1D). Consistently, the fluorescence intensity of anti-  
135 ZO-1 immunostaining at the plasma membrane in the polar TE cells was lower than that  
136 in the mural cells (Figure 1G left). In addition, the accumulation of F-actin at the cell  
137 membrane was also more evident in mural cells, which expanded more than polar TE  
138 cells (Figure 1G right). Since polar TE cells attach to the crowded ICM, these cells may  
139 be exposed to lower tensions.

140 These results are consistent with our previous finding that ZO-1 condensates decrease  
141 in the *Xenopus* ectodermal cells exposed to a higher tensile force (Hashimoto et al., 2019;  
142 Kinoshita et al., 2020). Those findings suggest that the embryonic cells of E4.5 embryos,  
143 especially TE cells on which more potent tensile forces than those of E3.5 embryos are  
144 applied due to the inner pressure of the growing blastocyst cavity, might have reduced the

145 number and volume of ZO-1 puncta in the cytoplasm.

146

### 147 ***ZO-1 condensate is regulated by a force-dependent mechanism***

148 It is known that developing mouse embryos from E4.0 to E4.5 experience a gradually  
149 increasing magnitude of luminal pressure due to expansion of the blastocyst cavity in the  
150 presence of the ZP (Chan et al., 2019; Leonavicius et al., 2018). Accordingly, the cortical  
151 tension of TE increases from E3.5 to E4.5 (Chan et al., 2019). To confirm that the  
152 disappearance of ZO-1 condensates from the cytoplasm is dependent on a mechanical  
153 force (inner hydraulic pressure of blastocyst cavity), using ouabain, we inhibited Na<sup>+</sup>/K<sup>+</sup>  
154 ATPase which promotes the influx of water and therefore increases the volume of the  
155 blastocyst cavity (Figure 2A, B). In these ouabain-treated embryos, significant numbers  
156 of ZO-1 condensates were retained in the cytoplasm of the mural cells of E4.5 embryos  
157 (Figures 2C-E), demonstrating that the cells released from the tension failed to trigger the  
158 dissolution of the ZO-1 condensates.

159 Next, we mechanically reduced tension by releasing the blastocoel fluid of the ZO-1-  
160 EGFP-expressing embryos by piercing embryos with a glass needle. Immediately after  
161 they were pierced, embryos shrank and membrane localization of ZO-1 was reduced,  
162 although it recovered within several hours (Figure 2F, G and Video S2). Immunostaining  
163 with the anti-ZO-1 antibody confirmed that endogenous ZO-1 also behaves in a similar  
164 way, observing more cytoplasmic puncta in pierced E4.5 embryos than in control E4.5  
165 embryos (Figure S2). Together, these results suggest that ZO-1 condensate deforms in a  
166 tensile force-dependent manner.

167

### 168 ***Cell type-dependent condensation of ZO-1***

169 To investigate the nature of the ZO-1 condensate, we performed a series of studies using  
170 *Xenopus laevis* A6 cells in which full-length and mutant forms of GFP-ZO-1 were  
171 transiently expressed for live-imaging (Figure 3A). In non-confluent A6 cells, full-length  
172 GFP-ZO-1 localized mostly in the cell periphery and partially colocalized with F-actin  
173 bundles (Figure 3B). It was intriguing, however, that in A6 cells, when GFP-ZO-1, which  
174 lacks an actin-binding domain (Fanning et al., 2002) (GFP-ZO-1 $\Delta$ ABD), was expressed,  
175 ZO-1 condensates became evident and formed large droplet-like structures with a smooth  
176 surface (Figure 3C). This suggests that the formation of condensate is normally restricted  
177 by the binding of ZO-1 to F-actin (Beutel et al., 2019; Schwyer et al., 2019) and that

178 GFP-ZO-1 $\Delta$ ABD lost its capacity for the interaction. In addition, we expressed the N-  
179 terminal half and the C-terminal half of ZO-1 tagged with GFP (Figure 3A; GFP-ZO-1 $\Delta$ C  
180 and  $\Delta$ N, respectively). Of note, the N-terminal half contains two IDRs while the C-  
181 terminal half has one relatively long stretch of IDR. We found that the N-terminal half is  
182 sufficient to form condensates in the cytoplasm (Figure 3D).

183 Supporting this notion, co-expression with a red fluorescent protein fused to F-actin-  
184 binding peptides, Lifeact, Utrophin and the actin-binding domain of Moesin  
185 (MoesinABD) similarly induced condensates that were indistinguishable from those  
186 induced by GFP-ZO-1 $\Delta$ ABD (Figure 3E). We also observed that the MoesinABD-  
187 induced ZO-1 condensates dynamically moved, sometimes fused and underwent fission  
188 (Video S3 and Figure S3), reminiscent of typical liquid droplets. Based on these results,  
189 we speculate that the interaction of ZO-1 with F-actin might block the formation of large  
190 condensates. We thus treated cells with Latrunculin B, a potent inhibitor of actin  
191 polymerization, and found that the formation and extinction of cytoplasmic ZO-1  
192 condensates depended on the development and destruction of the F-actin network (Figure  
193 3F and Video S4). These observations clearly indicate that the efficiency and growth of  
194 ZO-1 condensation are negatively regulated by the interaction with F-actin in A6 cells.

195 We next expressed GFP-ZO-1 in canine MDCK cells, which formed an epithelial-like  
196 cell sheet when they reached confluence. In sharp contrast to A6 cells, naïve MDCK cells  
197 in a non-confluent sparse culture displayed evident condensates in the cytoplasm (Figure  
198 4A). The average size of the ZO-1 condensate in A6 cells co-expressing MoesinABD and  
199 the naïve MDCK cells visualized by immunostaining were 0.8  $\mu$ m and 0.7  $\mu$ m,  
200 respectively (Figure 4B). These observations indicate that the condensation and  
201 localization of ZO-1 proteins depend largely on cell type. We then analyzed the properties  
202 of ZO-1 condensates in these cells.

203

#### 204 ***Dynamics of ZO-1 condensation in cultured cells***

205 To examine whether the ZO-1 condensates observed in the cultured cells are indeed the  
206 products of LLPS, we first treated A6 cells harboring GFP-ZO-1 puncta by co-expressing  
207 MoesinABD with digitonin, a cell-permeabilizing reagent that disrupts the equilibrium  
208 between the condensate and the cytoplasm. That treatment shrank the condensates within  
209 several minutes in A6 cells (Figure 4C and Video S5). GFP-ZO-1 puncta in MDCK cells  
210 behaved in a similar way following digitonin treatment (Figure 4D and Video S6).

211 Furthermore, we performed FRAP analyses for the condensates in A6 cells expressing  
212 MoesinABD or in naïve MDCK cells. In both A6 (+MoesinABD) and MDCK cells, after  
213 photo-bleaching, fluorescence immediately started to recover, reaching approx. 50%  
214 (Figure 4E and F). This quick and high recovery is a typical property of LLPS-mediated  
215 condensates (Shiina, 2019). These results demonstrate that the ZO-1 puncta are droplet-  
216 like condensates produced by LLPS and in equilibrium with the cytoplasm.

217

218 ***Disassembly of ZO-1 condensate is regulated by the establishment of robust cell-to-cell***  
219 ***contact***

220 To test the possibility that the formation of ZO-1 condensate is influenced by the  
221 mechanical environment in cultured cells as predicted from mouse embryogenesis, we  
222 grew MDCK cells to form islands in a culture dish. In those islands, cells in the central  
223 region reached confluence and formed a typical epithelial cell sheet. When we examined  
224 the condensate formation in the confluent MDCK monolayer, it was notable that cells in  
225 the central region lost the condensates, while the peripheral cells tended to have well-  
226 grown condensates (Figure 5A and B). However, we occasionally observed cells that  
227 harbor relatively large-sized condensates in the central region, but those cells were not  
228 well attached to, and were free from, neighboring cells (data not shown). A similar  
229 tendency was observed for endogenous ZO-1 protein detected by immunofluorescence  
230 using the anti-ZO-1 antibody (Figure 5C). As shown in the graph, cells in the forefront  
231 row (most outer layer) and the second row had 15 to 20 condensates per cell on average,  
232 whereas cells in the inner or central region had only a few condensates (Figure 5D). One  
233 feature that distinguishes the inner cells from peripheral cells is that after the cells reach  
234 confluency, the former adopt polygonal shapes and have higher densities than the latter  
235 (Figure 5C). This suggests that the inner cells establish a robust cell-to-cell contact by  
236 tight and adherens junctions which is physically supported by the actin cytoskeleton and  
237 an individual cell rigidly contacts with surrounding cells, resembling embryonic cells  
238 under tensile force.

239 To support this idea, we conducted a laser ablation assay. MDCK cells were grown so  
240 that the cells formed islands in one culture dish. Then the GFP-ZO-1 expression plasmid  
241 was transfected and the plasma membrane of GFP-ZO-1-expressing cells was irradiated  
242 with laser light. When cells inside of colonies that had ZO-1 at the cell junction were  
243 irradiated, cells became stable after irradiation due to cell-cell contact with neighboring



244 cells (Figure 5E and Video S7). When peripherally-located cells which had ZO-1 puncta  
245 were irradiated, those cells immediately erupted and disappeared after irradiation (Figure  
246 5F and Video S8). These results suggest that in MDCK cells, the formation of ZO-1  
247 condensate is negatively associated with the establishment of robust cell-to-cell contact.

248 To verify that idea, we reduced the cell-to-cell contact by treating MDCK cells  
249 expressing GFP-ZO-1 with PBS containing trypsin-EDTA. When the trypsin-EDTA  
250 solution was added, ZO-1 detached from the cell membrane and formed puncta as cells  
251 lost their contact (Figure S4 and Video S9). This result further confirmed the idea that the  
252 formation of ZO-1 condensate is regulated by cell-cell adhesion.

253 To further examine whether cell-to-cell contact negatively regulates ZO-1 condensate  
254 formation in MDCK cells, we conducted a wound-healing assay using GFP-ZO-1–  
255 expressing cells (Figure 6A-C and Video S10). Initially, most of the cells had few  
256 condensates in a confluent cell sheet. After scratching, cells started to actively move  
257 toward the wound site, forming a significant number of condensates. The FRAP assay  
258 revealed that the fluorescent signals of GFP-ZO-1 condensates that formed during the  
259 wound-healing assay recovered to about 40% within 10 min, suggesting that these  
260 condensates were formed by LLPS (Figure S5A-C, Video S11 and S12). This result  
261 indicates again that the formation of ZO-1 condensate is regulated by inter- and  
262 extracellular environments such as cell-to-cell contact, which in turn suggests that the  
263 cells that are harnessed with a well-developed F-actin network due to higher levels of  
264 cell-to-cell adhesion may hamper ZO-1 condensation. In fact, cortical F-actin was well-  
265 developed in the non-migrating polygonal cells far from the wound site, whereas  
266 migrating cells around the wound site developed more stress fibers at the expense of  
267 cortical actin (Figure 6D-F). This is consistent with our previous finding that *Xenopus*  
268 embryonic cells lost ZO-1 condensates when cell-to-cell junctions were enhanced after  
269 the application of force (Hashimoto et al., 2019; Kinoshita et al., 2020).

270 In addition, we found that hyper-osmolarity also induced the formation of ZO-1  
271 condensate. When A6 cells expressing GFP-ZO-1 were treated with a high-salt medium,  
272 ZO-1 formed puncta (Figure S5D and Video S13). They reversibly recovered when the  
273 high-salt medium was washed out, indicating that ZO-1 LLPS is regulated by osmolarity.  
274 As increased extracellular osmolarity led to a reduction in cell volume and loosening of  
275 the cell membrane, this cellular phenotype may also be attributed to decreased membrane  
276 tension and remodeling of F-actin.

277

## 278 **Discussion**

279 Our present study using mouse embryos as well as cultured cells, together with a  
280 previous study with *Xenopus* embryos, indicate that similar mechanisms may govern  
281 cellular responses to force across species. Briefly, mechanical stresses induced by forces  
282 generated by dynamic morphogenesis and/or vigorous cell movements during  
283 development, such as gastrulation, activate the force-dependent pathway leading to the  
284 remodeling of cell-to-cell junctions. The present study also suggests that the process  
285 involves the negative regulation of LLPS of ZO-1, leading to the collapse of ZO-1  
286 condensates in the cytoplasm. Since embryonic tissues, as well as some adult tissues such  
287 as heart and blood vessels, are constantly exposed to various forces including tensile force,  
288 shearing force, etc., and since ZO-1 is a structurally conserved protein among species, we  
289 propose that this mechanism may be employed to maintain the robustness and integrity  
290 of tissues against various forces in general, and could also be an evolutionary innovation  
291 when multicellular animal species such as placozoa emerged (Gonzalez-Mariscal et al.,  
292 2011). Although our previous study using *Xenopus* embryos identified that the function  
293 of the FGF receptor is essential for the force-induced pathway, it also suggested that FGF  
294 ligands are not required for signal activation, shedding light onto the as yet unrevealed  
295 activation mechanisms for FGFRs and other receptor tyrosine kinases (RTKs) by force.  
296 In fact, epidermal growth factor receptor (EGFR), which is an upstream RTK for Erk,  
297 was implicated in the mechanical force-dependent activation of Erk in the collective  
298 migration of wound-healing cells (Hino et al., 2020). In both cases, cell deformation by  
299 tensile forces appears to be the trigger of these pathways, supporting the idea that  
300 mechanoresponsive signaling pathways may be highly conserved.

301 Interestingly, our present study using cultured cells demonstrated that the efficacy of  
302 ZO-1 condensation as droplets largely depends on cell type, with MDCK cells forming  
303 droplets in standard culture conditions whereas A6 cells only did so when the actin-  
304 binding domain of ZO-1 was genetically deleted ( $\Delta$ ABD), actin-polymerization was  
305 inhibited, or actin was masked by its binding chemicals. These results suggest that the  
306 disintegration of ZO-1 condensates in the cytoplasm is regulated by the interaction  
307 between ZO-1 and F-actin, which in turn suggests that the difference between the amount  
308 and dynamics of F-actin may distinguish these two cell types. Conversely, the revelation  
309 of ZO-1 from F-actin is critical for maintaining large-sized ZO-1 condensate. These

310 notions further suggest that the control of ZO-1 re-localization from the cytoplasm to tight  
311 junctions is dependent on the remodeling of cytoskeletal actin. At present, it is unclear  
312 how the FGFR/Mek/Erk signal triggers or is related to the remodeling of actin and leads  
313 to the accumulation of ZO-1 to the junction, but it is assumed that the signal is converted  
314 into F-actin remodeling or ZO-1 phosphorylation, or both, as discussed next.

315 First, Erk might be able to regulate F-actin polymerization through small G proteins  
316 such as GEF-H1 and its downstream target RhoA (Fujishiro et al., 2008; Itoh et al., 2014;  
317 Ren et al., 1998). As described above, it was recently reported that Erk is activated in  
318 collectively migrating MDCK cells by EGFR and regulates F-actin organization and  
319 cellular contraction (Hino et al., 2020). Second, it is also possible that the cascade of  
320 phosphorylation initiated by FGFR might eventually result in the phosphorylation of ZO-  
321 1 protein, which has a number of potential phosphorylation sites for Ser/Thr kinases,  
322 raising the possibility that phosphorylation of ZO-1 by Erk or other kinases may be a key  
323 event for condensate dissolution. In fact, our previous report identified one particular site  
324 in ZO-1 (Ser278) in the N-terminal half containing two putative IDRs that are sufficient  
325 to form condensate, which was phosphorylated immediately after the application of force  
326 and dephosphorylated within an hour (Hashimoto et al., 2019). Functional examination  
327 of a possible link between RTK signaling and F-actin remodeling and a detailed  
328 investigation of ZO-1 phosphorylation sites, which are sensitive to force and regulate  
329 condensation, would provide useful information to clarify the force-dependent pathway.

330 What is the physiological significance of ZO-1 condensate formation? Why does ZO-1  
331 need to be compartmentalized into the condensate? This may be too premature to discuss  
332 before the nature of the ZO-1-containing condensate is fully understood, but we would  
333 like to propose that the condensate serves as a reservoir for ZO-1 protein when cells are  
334 relatively relaxed. Then, during development when the cells become stretched by tensile  
335 force leading to the activation of Erk and the remodeling of F-actin, ZO-1 condensate  
336 undergoes dissolution, and ZO-1 protein is delivered to the tight junction to exert its  
337 function. It has been reported that tension mediates the remodeling of cell junctions (Ito  
338 et al., 2017). Phase separation of ZO-1 may be directly involved in this regulatory system.  
339 In this scenario, it is possible that LLPS acts as an on-demand ON/OFF switch of ZO-1  
340 supply to the cell membrane from cytoplasm. This “reservoir mechanism” for ZO-1 may  
341 be shared and employed by multicellular animal species and its evolutionary origin is an  
342 intriguing problem worth studying in the future.

343 ZO-1, which is an essential component of the tight junction, contributes to establishing  
344 cell-to-cell adhesion and is therefore implicated in various pathologies, including cancer.  
345 Particularly, in EMT, the loss of cell-to-cell adhesion is known to drive the progress and  
346 metastasis of cancer. It is also known that in neuronal cells, some condensates which  
347 contain proteins such as the RNA-binding protein FUS (Murray et al., 2017) and tau  
348 implicated in Alzheimer's disease (Wegmann et al., 2018) become aggregated depending  
349 possibly on their concentrations, some time after their formation and/or their chemical  
350 modifications. Those proteins are irreversibly aggregated and become dysfunctional,  
351 attenuating the neuronal activity of the cells. Collectively considering these observations,  
352 we speculate that impairment of the normal regulation of the LLPS of ZO-1 due to  
353 changes in intracellular or extracellular conditions could be a possible cause for cancer  
354 pathology. Therefore, in addition to embryogenesis, investigating the behavior of ZO-1  
355 in adult tissues, especially in pathological conditions, would deepen the understanding of  
356 the physiological significance of the ZO-1 reservoir in cells.

357

### 358 **Acknowledgments**

359 R26-ZO-1-GFP mice were provided by LARGE, BDR (accession # CDB026K),  
360 RIKEN, Japan. We thank Dr. Fumio Matsuzaki, RIKEN, for human ZO-1 cDNA, Dr.  
361 Makoto Suzuki, Hiroshima University, for the GFP-ZO-1/pCS2 construct, and Dr.  
362 Lance Davidson, University of Pittsburgh, for the mCherry-Utrophin construct. We  
363 thank Dr. Yuko Mimori-Kiyosue, RIKEN, for A6 cells and Dr. Mitsuru Nishita,  
364 Fukushima Medical University, and Dr. Kensaku Mizuno, Tohoku University, for  
365 MDCK I cells. We thank the BioImaging Facility, Core Research Facilities of the  
366 National Institute for Basic Biology (NIBB), for providing us with technical support for  
367 live imaging and FRAP analysis. We also thank Dr. Nobuyuki Shiina, NIBB, and Dr.  
368 Michael Levine, Princeton University, for technical advice and useful discussion on  
369 LLPS and insightful comments on this work. This research was supported by JSPS  
370 KAKENHI 20K06663 to NK, JSPS KAKENHI 17H03689 and 16H06280 to TF, and  
371 MEXT KAKENHI 22127007 and JSPS KAKENHI 15H05865 to NU. TF and NU were  
372 also supported by JST CREST JPMJCR1654, and Joint Research of the Exploratory  
373 Research Center on Life and Living Systems (ExCELLS), respectively.

374

375 **Figure legends**

376

377 **Figure 1. Change of ZO-1 localization in mouse hatching embryos.**

378 **A.** Schematic diagram of the hatching process of the mouse embryo. At E3.5, the  
379 embryo is covered with the zona pellucida (ZP). During hatching, the embryo is  
380 enlarged with an expansion of trophectoderm (TE) and emerges from the ZP. **B.**  
381 Immunofluorescence of mouse E3.5 and E4.5 embryos. Embryos were stained with an  
382 anti-ZO-1 antibody, Hoechst 33342 and Alexa Fluor 546 Phalloidin. Scale bar, 20  $\mu$ m.  
383 The inset in the E3.5 phalloidin image was acquired with higher laser power,  
384 demonstrating that the structure of cortical F-actin is formed at E3.5 even though the  
385 signal intensity was weaker than that in the E4.5 embryo. The bottom panels are  
386 enlarged images from the middle panels indicated by white squares. **C - G.** Quantitative  
387 analyses of mouse embryos. The nuclear-dense inner cell mass (ICM) region was  
388 determined by Hoechst staining. ‘Polar’ indicates TE to which ICM was attached, and  
389 ‘mural’ includes TE to which ICM was not attached. 4 - 5 embryos were analyzed for  
390 each condition. **C.** The signal intensities of ZO-1 at the cell periphery of the mural TE at  
391 E3.5 and E4.5 were quantified. **D.** The number of particles in one TE cell was counted.  
392 **E.** The areas of the TE cells were quantified. **F.** Fluorescence intensity of whole  
393 embryos stained with the anti-ZO-1 antibody and phalloidin was measured. For  
394 comparison, intensities were normalized by Hoechst staining intensity.  $n = 5$  embryos.  
395 **G.** The signal intensities of ZO-1 and phalloidin at the cell periphery of the mural and  
396 polar TE of E4.5 embryos were quantified. n.s.: not significant.  $*p < 0.01$ .

397

398 **Figure 2. Expansion of TE regulates ZO-1 localization.**

399 **A and B.** Embryos were obtained at E3.5 and cultured for 24 h in the absence (A) or  
400 presence of 0.3 mM ouabain (+Ob) (B). Embryos were immunostained with the anti-  
401 ZO-1 antibody (left) and the images were analyzed using particle analysis in Image J  
402 (right). **C-E.** The percentage of the particle area (C), number of particles (D) and cell  
403 size (E) of E4.5 mural TE cells were quantified and plotted. **F.** E4.5 mouse embryos  
404 expressing ZO-1-GFP were pierced with a glass needle. Pierced embryos shrank  
405 immediately and the recovery process was imaged. **G.** The fluorescence intensity of  
406 GFP-ZO-1 at the cell periphery at 0 h and 6 h were quantified. The X-axis indicates  
407 distance from the cell membrane. Scale bars, 20  $\mu$ m.  $*p < 0.01$ .

408

409 **Figure 3. ZO-1 localization is regulated by F-actin in A6 cells.**

410 **A.** Domain structure of ZO-1 protein and expression constructs used here, GFP-tagged  
411 full-length human ZO-1 (GFP-ZO-1), actin-binding domain (ABD)-deletion mutant  
412 (GFP-ZO-1 $\Delta$ ABD), GFP-ZO-1 $\Delta$ C and GFP-ZO-1 $\Delta$ N. IDRs were predicted by PrDOS  
413 (protein disorder prediction system) (Ishida and Kinoshita, 2007). **B.** GFP ZO-1 was  
414 transiently expressed in *Xenopus laevis* A6 kidney cells. Cells were fixed and stained  
415 with fluorescent phalloidin. **C.** Localization of GFP-ZO-1 and GFP-ZO-1 $\Delta$ ABD. **D.**  
416 Localization of GFP-ZO-1  $\Delta$ C and  $\Delta$ N. **E.** GFP-ZO-1 was co-expressed with actin-  
417 binding constructs tagged with a red fluorescent protein. Lifeact-RFP, mCherry-  
418 Utrophin and RFP-MoesinABD (actin-binding domain). **F.** A6 cells expressing GFP-  
419 ZO-1 were treated with 0.5  $\mu$ M latrunculin B for 20 min, which was then washed out.  
420 Scale bars, 20  $\mu$ m.

421

422 **Figure 4. Dynamics of GFP-ZO-1 particles expressed in A6 and MDCK cells.**

423 **A.** GFP-ZO-1 was transiently expressed in MDCK cells. When MDCK cells were  
424 sparsely distributed, GFP-ZO-1 formed cytoplasmic puncta. When GFP-ZO-1 was  
425 expressed in densely cultured MDCK cells, ZO-1 localization was different (see Figure  
426 6A and the main text). In this figure, sparsely-distributed cells were shown. **B.** The size  
427 of ZO-1 puncta in A6 cells co-expressed with MoesinABD and in MDCK cells were  
428 compared. **C** and **E.** GFP-ZO-1 in A6 cells co-expressing MoesinABD. **D** and **F.** GFP-  
429 ZO-1 in MDCK cells. **C** and **D.** Cells expressing GFP-ZO-1 were semi-permeabilized  
430 with 0.012% digitonin. The size of puncta was quantified with Image J particle analysis.  
431  $n = 12$  and  $6$  puncta, respectively. **E** and **F.** Fluorescent recovery after photobleaching  
432 (FRAP) assay. The recovery of fluorescence was quantified.  $n = 20$  puncta. Scale bars,  
433 20  $\mu$ m.

434

435 **Figure 5. Dynamics of ZO-1 puncta in MDCK and A6 cells.**

436 **A** and **B.** GFP-ZO-1 was expressed in MDCK cells, forming islands. In cells located  
437 inside of islands (indicated by arrowheads), GFP-ZO-1 was localized mainly at the  
438 plasma membrane. In contrast, in cells at the periphery or outside of the colony  
439 (indicated by arrows), GFP-ZO-1 formed puncta. **C.** MDCK cells that formed a colony  
440 were immunostained with the anti-ZO-1 antibody. Images were analyzed using ‘particle

441 analysis' in Image J software. **D.** Cells in the island were divided into three groups with  
442 respect to their location, namely the first and second rows from the edge, and the central  
443 region of the island. The number of particles in each cell was counted.  $n = 20$  cells.  $*p <$   
444  $0.01$ . **E-G.** Laser ablation of MDCK cells expressing GFP-ZO-1. **E.** Cells inside of an  
445 island which had GFP-ZO-1 around the cell membrane. About 80% of these cells  
446 remained stable after ablation (Video S7). **F.** A cell located close to the edge of an  
447 island, and which had GFP-ZO-1 puncta. About 80% of these cells rapidly erupted and  
448 detached from the bottom of the dish (Video S8). Arrowheads indicate laser ablation  
449 sites. **G.** A statistical summary of the laser ablation experiment. "attached" indicates  
450 cells that stayed attached to the dish after ablation, as shown in **E**. "erupted" indicates  
451 cells that erupted after ablation and detached from the dish, as shown in **F**. Data were  
452 obtained from two experiments. The total numbers of cells for the laser ablation were 26  
453 inside and 24 outside cells. Scale bars, 20  $\mu\text{m}$ .

454

#### 455 **Figure 6. Wound-healing assay using MDCK cells expressing GFP-ZO-1**

456 **A and B.** The confluent cell sheet was scratched and observed. Just after scratching (0  
457 h), GFP-ZO-1 was at the cell periphery, whereas after 3 hours (3 h), it formed puncta in  
458 many of the cells close to the scratch (within 200  $\mu\text{m}$ ). Cells in **B** were magnified from  
459 #1 and #2 cells in **A**. Scale bar, 20  $\mu\text{m}$ . **C.** The number of cells with GFP-ZO-1 particles  
460 were counted. Cells located within 200  $\mu\text{m}$  from the scratch site were defined as "edge"  
461 cells. Cells more than 200  $\mu\text{m}$  away from the scratch site were defined as "inner" cells.  
462 The data were obtained from three experiments. **D and E.** Inner and edge cells were  
463 fixed 10 h after scratching and stained with phalloidin. The arrow indicates the wound  
464 site. Scale bar, 20  $\mu\text{m}$ . **F.** Fluorescence intensity of phalloidin staining at the plasma  
465 membrane was measured.  $*p < 0.01$ .

466

467 **Supplementary Figure and Video Legends**

468 **Figure S1. E3.5 and E4.5 embryos expressing ZO-1-EGFP (related to Figure 1)**

469 **A.** Embryos from mice expressing ZO-1-EGFP by EGFP-knock-in were observed.  
470 Before hatching (E3.5), ZO-1 puncta were observed around the cell periphery, but cell-  
471 cell boundaries were not clear. After hatching (E4.5), membrane localization of ZO-1-  
472 GFP became evident. The signal around the nuclei in the TE and large puncta in the  
473 ICM are autofluorescence, which was confirmed by observation of wild-type mouse  
474 embryos not expressing ZO-1-GFP (data not shown). **B.** Mouse E3.5 and E4.5 embryos  
475 expressing ZO-1-EGFP at higher magnification. **C.** Fluorescence intensity around cell  
476 boundaries in ZO-1-EGFP-expressing embryos was quantified. After hatching, ZO-1-  
477 EGFP localized to the plasma membrane and formed sharp boundaries with ZO-1-  
478 EGFP. Scale bars, 20  $\mu\text{m}$ .

479

480 **Figure S2. Immunofluorescence of mouse E4.5 embryos pierced with a glass needle**  
481 **(related to Figure 2)**

482 **A.** Mouse E4.5 embryos expressing ZO-1-GFP were pierced with a glass needle, then  
483 the volume of the blastocyst cavity was reduced, and embryos shrank. Those embryos  
484 were fixed and immunostained. **B.** The number of particles was counted using Image J  
485 particle analysis. **C.** The area of particles and cytoplasm of one mural TE cell was  
486 measured by Image J software, and the ratio of those values was plotted. \* $p < 0.01$ .

487

488 **Figure S3. Dynamics of GFP-ZO-1 puncta in A6 cell co-expressing RFP-**  
489 **MoesinABD (related to Figure 3)**

490 Puncta often underwent fission and fusion, as indicated by arrowheads. These images  
491 are from Video S3.

492

493 **Figure S4. Trypsin-EDTA treatment of confluent growing MDCK cells**  
494 **expressing GFP-ZO-1 (related to Figure 5)**

495 As cells lost their cell-cell contact and their shape became spherical, ZO-1 detached  
496 from the plasma membrane and formed puncta. These images are from Video S9.

497

498 **Figure S5. Localization of GFP-ZO-1 in a wound-healing assay and in osmolarity**  
499 **change in MDCK cells (related to Figure 6)**



500 **A-C. Wound-healing assay followed by FRAP assay.** **A.** Cells that formed GFP-ZO-1  
501 puncta in the wound-healing assay. The cell indicated by the square and the arrowhead  
502 was used for the following FRAP assay. **B** and **C.** GFP-ZO-1 puncta formed during  
503 wound healing were subjected for the FRAP assay. Three cells were analyzed. **D.** An A6  
504 cell expressing GFP-ZO-1 was treated with a high-salt medium (four-fold higher  
505 concentration of PBS) for 40 min then returned to standard medium. Scale bars, 20  $\mu$ m.

506

507 **Video S1.** Mouse embryos expressing ZO-1-EGFP were flushed from uteri at one-day  
508 post-coitum and observed by time-lapse microscopy for 92 h (related to Figure S1).

509

510 **Video S2.** Mouse E4.5 embryos expressing ZO-1-EGFP were pierced by a glass needle  
511 and observed by time-lapse microscopy (related to Figure 2F).

512

513 **Video S3.** An A6 cell co-expressing GFP-ZO-1 and RFP-MoesinABD was imaged by  
514 time-lapse microscopy for 885 min (related to Figure S3).

515

516 **Video S4.** Latrunculin B treatment of an A6 cell co-expressing GFP-ZO-1 and RFP-  
517 MoesinABD (related to Figure 3F).

518

519 **Video S5.** A6 cells co-expressing GFP-ZO-1 and RFP-MoesinABD were treated with  
520 digitonin ("digitonin" at 50 sec in the video) and imaged by time-lapse microscopy  
521 (related to Figure 4C).

522

523 **Video S6.** An MDCK cell expressing GFP-ZO-1 was treated with digitonin  
524 ("digitonin" at 50 sec in the video) and imaged by time-lapse microscopy (related to  
525 Figure 4D).

526

527 **Video S7.** Laser ablation of MDCK cells expressing GFP-ZO-1 inside of the island. The  
528 laser was irradiated at 4 sec at the membrane indicated by arrowheads (related to Figure  
529 5E).

530

531 **Video S8.** Laser ablation of MDCK cells expressing GFP-ZO-1 at the periphery of the  
532 island. The laser was irradiated at 4 sec at the membrane indicated by the arrowhead.

533 The cell erupted and disappeared immediately after irradiation (related to Figure 5F).

534

535 **Video S9.** MDCK cells expressing GFP-ZO-1 were treated with a trypsin-EDTA

536 solution. The video starts immediately after treatment (related to Figure S4).

537

538 **Video S10.** A wound-healing assay of MDCK cells. A sheet of MDCK cells transfected

539 with the GFP-ZO-1 construct was scratched and observed by time-lapse microscopy

540 (related to Figure 6).

541

542 **Video S11.** A wound-healing assay of MDCK cells, followed by a FRAP assay (1). A

543 sheet of MDCK cells transfected with the GFP-ZO-1 construct was scratched and

544 observed by time-lapse microscopy (related to Figure S5A). The cell for the following

545 FRAP assay was indicated by an arrowhead at the first and the last frames.

546

547 **Video S12.** A wound-healing assay of MDCK cells, followed by a FRAP assay (2).

548 FRAP assay was conducted using a cell in Video S11 which formed ZO-1 puncta

549 (related to Figure S5B). The granule bleached in the FRAP assay was indicated by an

550 arrowhead.

551

552 **Video S13.** A6 cell expressing GFP-ZO-1 was treated with a high-salt medium (four-

553 fold higher concentration of PBS) at the 4-min time point indicated by "+osmo" in the

554 video and then returned to normal medium at the 55-min time point indicated by "wash

555 out" (related to Figure S5D)..

556

557

## Methods

558

### KEY RESOURCES TABLE

| REAGENT or RESOURCE                                  | SOURCE                   | IDENTIFIER                             |
|------------------------------------------------------|--------------------------|----------------------------------------|
| <b>Antibodies</b>                                    |                          |                                        |
| anti-ZO-1 antibody                                   | Thermo Fisher Scientific | cat. # 33-9100;<br>RRID:AB_253314<br>7 |
| goat anti-mouse IgG antibody, Alexa Fluor 488        | Thermo Fisher Scientific | cat. # A28175;<br>RRID:AB_253616<br>1  |
| <b>Chemicals, Peptides, and Recombinant Proteins</b> |                          |                                        |
| Blocking One                                         | Nacalai Tesque           | cat.# 03953                            |
| KSOM                                                 | Millipore                | cat. # MR-106D                         |
| ouabain                                              | Sigma                    | cat.# O3125                            |
| Alexa Fluor 546 Phalloidin                           | Thermo Fisher Scientific | cat.# A22283;<br>RRID:AB_263295<br>3   |
| Hoechst 33342                                        | Thermo Fisher Scientific | cat.# H3570                            |
| Lipofectamine 2000                                   | Invitrogen               | cat. # 11668-027                       |
| Effectene                                            | Qiagen                   | cat. # 301425                          |
| Latrunculin B                                        | Enzo Life Science        | cat. # BML-T110-0001                   |
| digitonin                                            | WAKO                     | cat. # 048-02124                       |
| trypsin                                              | Nacalai Tesque           | cat # 35555-54                         |
| <b>Experimental Models: Organisms/Strains</b>        |                          |                                        |
| <i>Xenopus laevis</i> (J-strain)                     | N/A                      | N/A                                    |
| R26-ZO-1EGFP                                         | RIKEN                    | accession #<br>CDB026K                 |
| wild type ICR mice                                   | Japan CREA               | N/A                                    |
| <b>Experimental Models: Cell Lines</b>               |                          |                                        |

|                                                  |                              |                                                                                                                                                 |
|--------------------------------------------------|------------------------------|-------------------------------------------------------------------------------------------------------------------------------------------------|
| MDCK I cells                                     | Fujiwara et al. (2016)       | N/A                                                                                                                                             |
| A6 cells                                         | Mimori-Kiyosue et al. (2007) | N/A                                                                                                                                             |
| Recombinant DNA                                  |                              |                                                                                                                                                 |
| human ZO-1                                       | Konno et al. (2008)          | N/A                                                                                                                                             |
| GFP-ZO-1/pCS2                                    | This paper                   | N/A                                                                                                                                             |
| GFP-ZO-1 $\Delta$ ABD/pCS2 ( $\Delta$ 1151-1371) | This paper                   | N/A                                                                                                                                             |
| GFP-ZO-1 $\Delta$ C/pCS2 ( $\Delta$ 595-1748)    | This paper                   | N/A                                                                                                                                             |
| GFP-ZO-1 $\Delta$ N/pCS2 ( $\Delta$ 1-594)       | This paper                   | N/A                                                                                                                                             |
| Lifeact-RFP                                      | lioka et al. (2007)          | N/A                                                                                                                                             |
| RFP-MoesinABD                                    | lioka et al. (2004)          | N/A                                                                                                                                             |
| mCherry-Utrophin                                 | Kim and Davidson (2013)      | N/A                                                                                                                                             |
| Software and Algorithms                          |                              |                                                                                                                                                 |
| Fiji                                             | NIH                          | <a href="https://fiji.sc">https://fiji.sc</a>                                                                                                   |
| Python 3.6                                       | Python Core Team             | <a href="https://www.python.org">https://www.python.org</a>                                                                                     |
| Pandas                                           | v0.22                        | <a href="http://pandas.pydata.org">http://pandas.pydata.org</a>                                                                                 |
| seaborn                                          | v0.8                         | <a href="https://seaborn.pydata.org">https://seaborn.pydata.org</a>                                                                             |
| Matplotlib                                       | v2.2                         | <a href="https://matplotlib.org">https://matplotlib.org</a>                                                                                     |
| Andor IQ2                                        | Oxford Instruments           | <a href="https://andor.oxinst.com/products/iq-live-cell-imaging-software/">https://andor.oxinst.com/products/iq-live-cell-imaging-software/</a> |
| PrDOS (protein disorder prediction system)       | (Ishida and Kinoshita, 2007) | <a href="http://prdos.hgc.jp/cgi-bin/top.cgi">http://prdos.hgc.jp/cgi-bin/top.cgi</a>                                                           |

560

561 **Lead Contact and Materials Availability**

562

563 Further information and requests for resources and reagents should be directed to and  
564 will be fulfilled by the Lead Contact, Naoto Ueno (nueno@nibb.ac.jp.). All  
565 unique/stable reagents generated in this study are available from the Lead Contact with  
566 a completed Material Transfer Agreement.

567

568 **Method details**

569

570 **Mouse embryo collection**

571 Animal care and experiments were conducted in accordance with the Guidelines of  
572 Animal Experimentation of the National Institutes for Natural Sciences. All animal  
573 experiments were approved by the Animal Research Committee of the National  
574 Institutes for Natural Sciences. Mice were maintained in a light- and temperature-  
575 controlled room using a 12 h light:12 h dark cycle at 23 $\pm$ 2 °C.

576 Males of R26-ZO-1EGFP (Katsunuma et al., 2016) or wild type ICR (Japan CREA)  
577 were mated with wild type ICR females to obtain blastocysts. Preimplantation E3.5  
578 embryos were flushed from uteri with KSOM (MR-106D, Millipore). Embryos were  
579 cultured in KSOM covered with mineral oil at 37 °C and 5% CO<sub>2</sub>. Fluorescent signals  
580 were monitored using a confocal microscope (A1, Nikon) or a spinning disc confocal  
581 microscope (CV1000, Yokogawa). For immunofluorescence, embryos were fixed at  
582 4 °C in 4% paraformaldehyde (PFA) in PBS overnight. For ouabain treatment, 10 mM  
583 ouabain (cat. # O3125, Sigma) in DMSO were diluted to the indicated concentrations.

584

585 **Manipulation of mouse embryos**

586 To remove the zona pellucida, embryos were treated with Tyrode's solution (Bradley,  
587 1987). Embryos were transferred to a drop of Tyrode's solution. The zona was removed  
588 typically within 1 min. Then, embryos were washed three times in KSOM. To pierce the  
589 mural trophectoderm, microinjection needles were made from a 1 mm diameter glass  
590 capillary (GD1, Narishige), the needle was set to a micromanipulator (Leica), and  
591 embryos were pierced with the needle by manual manipulation.

592

593 **Immunofluorescence with mouse embryos**

594 Fixed embryos were washed three times with 1% bovine serum albumin (BSA) in PBS,  
595 and then soaked in a blocking solution, 0.1% Triton X-100 in Blocking One (cat. #  
596 03953, Nacalai, Japan) for 1 h at room temperature. Then, the embryos were incubated  
597 in the primary antibody solution containing an anti-ZO-1 antibody (cat. # 33-9100,  
598 Thermo) diluted 100-times in Blocking One at 4 °C overnight. After washing three  
599 times with the blocking solution, embryos were incubated in a secondary antibody  
600 solution containing 100-times diluted goat anti-mouse IgG antibody Alexa Fluor 488  
601 (cat. # A27185, Thermo), 100-times diluted Alexa Fluor 546 Phalloidin (cat. # A22283,  
602 Thermo Fisher), and 10 µg/ml Hoechst 33342 (cat. # H3570, Thermo Fisher) in  
603 Blocking One. Fluorescent signals were monitored using Nikon A1 or Leica SP8  
604 confocal microscopes.

605

606 **Measurement of fluorescent intensities and particle analyses**

607 Fiji/Image J was used to measure fluorescent intensities. Particle analyses in Fiji/Image  
608 J were used to count the numbers of particles and measure particle areas. Images were  
609 converted to an 8-bit type, and cytoplasmic regions were manually determined. The  
610 "analysis particles" program was run with the threshold signal value set at 20, and  
611 circularity was 0.25-1.0 for the definition of particles.

612

613 **GFP-ZO-1 expression constructs**

614 Human ZO-1 cDNA was a gift from Dr. Fumio Matsuzaki (Konno et al., 2008). EGFP-  
615 human ZO-1/pCS2 was constructed by Dr. Makoto Suzuki. ZO-1ΔABD lacks amino  
616 acid (aa) # 1151-1371. ZO-1ΔC lacks aa # 595-1748. ZO-1-1ΔN lacks aa # 1-594.  
617 Lifeact-RFP is described in Iioka et al. (2007). MoesinABD is described in Iioka et al.  
618 (2004). The mCherry-Utrophin construct was a gift from Lance A. Davidson (Kim and  
619 Davidson, 2013).

620

621 **Cell culture and transfection of plasmids**

622 A6 cells, established from a normal *X. laevis* kidney, were a gift from Dr. Yuko Mimori-  
623 Kiyosue (Mimori-Kiyosue et al., 2007). A6 cells were grown at 24 °C without CO<sub>2</sub> in  
624 Leibovitz's L-15 medium (50% L-15 medium, 10% fetal bovine serum (FBS), 200 mg/l  
625 kanamycin). MDCK cells were a gift from Dr. Mitsuru Nishita and Dr. Kensaku

626 Mizuno. MDCK cells were cultured in Dulbecco's modified Eagle medium (DMEM)  
627 containing 10% FBS. Transfection was conducted using Lipofectamine 2000  
628 (Invitrogen # 11668-027) for MDCK cells and Effectene (Qiagen # 301425) for A6 cells  
629 following the manufacturers' instructions.

630

### 631 **Immunofluorescence of the tissue culture cells**

632 Cells were fixed in 4% PFA in PBS at 4 °C overnight, washed with 0.1% Triton X-100  
633 in PBS. Blocking One (cat. # 03953, Nacalai Tesque, Japan) was used to block for 1 h at  
634 room temperature, followed by incubation in the primary antibody solution, a 100-times  
635 diluted anti-ZO-1 antibody (cat. # 33-9100, Thermo) in Blocking One at 4 °C overnight.  
636 After washing three times in Blocking One, cells were incubated in the secondary  
637 antibody solution containing 200-times diluted goat anti-mouse IgG antibody Alexa  
638 Flour 488 (cat. # A27185, Thermo) and 200-times diluted Alexa Fluor 546 Phalloidin  
639 (cat. # A22283, Thermo Fisher) in Blocking One at 4 °C overnight. After washing three  
640 times in PBS, cells were observed using a Leica SP8 confocal microscope.

641

### 642 **Laser ablation**

643 Laser ablation was conducted using an Olympus IX 81 inverted microscope (20 x /0.70  
644 NA dry objective lens), equipped with a spinning-disc confocal unit Yokogawa CSUX-1  
645 and iXon3 897 EM-CCD camera (Andor), controlled with Andor IQ2 software. An N2  
646 Micropoint laser (16 Hz, 365 nm, 2.0 μW, Photonic Instruments) was focused on the  
647 membrane at the cell membrane. Time-lapse images were acquired every 200 msec  
648 before and during the laser ablation process and analyzed with Fiji software.

649

### 650 **Fluorescence recovery after photobleaching (FRAP)**

651 FRAP assays in the tissue culture cells were conducted with a Leica SP8 confocal  
652 microscope and software equipped in the microscope operating system. Regions of  
653 interest (ROI) were bleached using a 488 nm laser. Pre-bleach and post-bleach images  
654 were acquired with a 488 nm laser. Fluorescence recovery of GFP-ZO-1 was monitored.  
655 Recovery data were background corrected and normalized to the ROI intensity before  
656 bleaching. A reference ROI outside the bleached area was processed in the same way.

657

### 658 **Observation of GFP-ZO-1 dynamics in the tissue culture cells**

659 For the wound-healing assay, MDCK cells almost confluent grown on a glass-bottom  
660 dish were transfected with GFP-ZO-1/pCS2. After one day, the cell layer was scratched  
661 with a Pipetman tip, incubated at 37 °C, 5% CO<sub>2</sub> in a stage-top incubator (cat. # STXG,  
662 Tokai HIT, Japan) and observed by a Leica SP8 confocal microscope.

663 For the latrunculin B treatment, 2.5 μM latrunculin B in the culture medium was added  
664 to the culture dish of A6 cells transiently expressing GFP-ZO-1 so that the final  
665 concentration of latrunculin B was 0.5 μM. For digitonin treatment, 0.06% digitonin in  
666 the culture medium was added to the culture dish so that the final concentration of  
667 digitonin was 0.012%. For hyperosmolarity treatment of A6 cells, 10 x PBS was added  
668 so that the concentration of PBS changed from 0.5 x to 1.5 x. Cells were observed at  
669 room temperature. For the trypsin-EDTA treatment, the culture medium of MDCK cells  
670 was replaced with PBS containing 0.05% trypsin and 1 mM EDTA.  
671



672 **References**

673

674 Anderson, J.M., Stevenson, B.R., Jesaitis, L.A., Goodenough, D.A., and Mooseker, M.S.  
675 (1988). Characterization of ZO-1, a protein component of the tight junction from mouse  
676 liver and Madin-Darby canine kidney cells. *J Cell Biol* *106*, 1141-1149.

677 Baum, B., Settleman, J., and Quinlan, M.P. (2008). Transitions between epithelial and  
678 mesenchymal states in development and disease. *Semin Cell Dev Biol* *19*, 294-308.

679 Beutel, O., Maraschini, R., Pombo-Garcia, K., Martin-Lemaitre, C., and Honigsmann, A.  
680 (2019). Phase Separation of Zonula Occludens Proteins Drives Formation of Tight  
681 Junctions. *Cell* *179*, 923-936.

682 Bodor, D.L., Ponisch, W., Endres, R.G., and Paluch, E.K. (2020). Of Cell Shapes and  
683 Motion: The Physical Basis of Animal Cell Migration. *Dev Cell* *52*, 550-562.

684 Bradley, A. (1987). Production and analysis of chimeric mice. In *Teratocarcinoma and*  
685 *Embryonic Stem Cells*, E.J. Robertson, ed. (Oxford: IRL Press), pp. 113-151.

686 Brangwynne, C.P. (2013). Phase transitions and size scaling of membrane-less organelles.  
687 *J Cell Biol* *203*, 875-881.

688 Chan, C.J., Costanzo, M., Ruiz-Herrero, T., Monke, G., Petrie, R.J., Bergert, M., Diz-  
689 Munoz, A., Mahadevan, L., and Hiiragi, T. (2019). Hydraulic control of mammalian  
690 embryo size and cell fate. *Nature* *571*, 112-116.

691 Choi, Y.S., Sehgal, R., McCrea, P., and Gumbiner, B. (1990). A cadherin-like protein in  
692 eggs and cleaving embryos of *Xenopus laevis* is expressed in oocytes in response to  
693 progesterone. *J Cell Biol* *110*, 1575-1582.

694 Fanning, A.S., Ma, T.Y., and Anderson, J.M. (2002). Isolation and functional  
695 characterization of the actin binding region in the tight junction protein ZO-1. *FASEB J*  
696 *16*, 1835-1837.

697 Fujishiro, S.H., Tanimura, S., Mure, S., Kashimoto, Y., Watanabe, K., and Kohno, M.  
698 (2008). ERK1/2 phosphorylate GEF-H1 to enhance its guanine nucleotide exchange  
699 activity toward RhoA. *Biochemical and biophysical research communications* *368*, 162-  
700 167.

701 Fujiwara, S., Ohashi, K., Mashiko, T., Kondo, H., and Mizuno, K. (2016). Interplay  
702 between Solo and keratin filaments is crucial for mechanical force-induced stress fiber  
703 reinforcement. *Mol Biol Cell* *27*, 954-966.

704 Ginsberg, D., DeSimone, D., and Geiger, B. (1991). Expression of a novel cadherin (EP-

705 cadherin) in unfertilized eggs and early *Xenopus* embryos. *Development* *111*, 315-325.  
706 Godard, B.G., and Heisenberg, C.P. (2019). Cell division and tissue mechanics. *Curr Opin*  
707 *Cell Biol* *60*, 114-120.  
708 Gonzalez-Mariscal, L., Quiros, M., and Diaz-Coranguez, M. (2011). ZO proteins and  
709 redox-dependent processes. *Antioxid Redox Signal* *15*, 1235-1253.  
710 Hallou, A., and Brunet, T. (2020). On growth and force: mechanical forces in  
711 development. *Development* *147*, dev187302.  
712 Hannezo, E., and Heisenberg, C.P. (2019). Mechanochemical Feedback Loops in  
713 Development and Disease. *Cell* *178*, 12-25.  
714 Hashimoto, Y., Kinoshita, N., Greco, T.M., Federspiel, J.D., Jean Beltran, P.M., Ueno, N.,  
715 and Cristea, I.M. (2019). Mechanical force induces phosphorylation-mediated signaling  
716 that underlies tissue response and robustness in *Xenopus* embryos. *Cell systems* *8*, 226-  
717 241.  
718 Hernandez-Vega, A., Marsal, M., Pouille, P.A., Tosi, S., Colombelli, J., Luque, T.,  
719 Navajas, D., Pagonabarraga, I., and Martin-Blanco, E. (2017). Polarized cortical tension  
720 drives zebrafish epiboly movements. *The EMBO journal* *36*, 25-41.  
721 Hino, N., Rossetti, L., Marin-Llaurado, A., Aoki, K., Trepats, X., Matsuda, M., and  
722 Hirashima, T. (2020). ERK-Mediated Mechanochemical Waves Direct Collective Cell  
723 Polarization. *Dev Cell* *53*, 646-660.  
724 Iioka, H., Iemura, S., Natsume, T., and Kinoshita, N. (2007). Wnt signalling regulates  
725 paxillin ubiquitination essential for mesodermal cell motility. *Nat Cell Biol* *9*, 813-821.  
726 Iioka, H., Ueno, N., and Kinoshita, N. (2004). Essential role of MARCKS in cortical actin  
727 dynamics during gastrulation movements. *J Cell Biol* *164*, 169-174.  
728 Ishida, T., and Kinoshita, K. (2007). PrDOS: prediction of disordered protein regions  
729 from amino acid sequence. *Nucleic Acids Res* *35*, W460-464.  
730 Ito, S., Okuda, S., Abe, M., Fujimoto, M., Onuki, T., Nishimura, T., and Takeichi, M.  
731 (2017). Induced cortical tension restores functional junctions in adhesion-defective  
732 carcinoma cells. *Nat Commun* *8*, 1834.  
733 Itoh, K., Ossipova, O., and Sokol, S.Y. (2014). GEF-H1 functions in apical constriction  
734 and cell intercalations and is essential for vertebrate neural tube closure. *J Cell Sci* *127*,  
735 2542-2553.  
736 Kato, M., Han, T.W., Xie, S., Shi, K., Du, X., Wu, L.C., Mirzaei, H., Goldsmith, E.J.,  
737 Longgood, J., Pei, J., *et al.* (2012). Cell-free formation of RNA granules: low complexity

738 sequence domains form dynamic fibers within hydrogels. *Cell* *149*, 753-767.

739 Katsunuma, S., Honda, H., Shinoda, T., Ishimoto, Y., Miyata, T., Kiyonari, H., Abe, T.,  
740 Nibu, K., Takai, Y., and Togashi, H. (2016). Synergistic action of nectins and cadherins  
741 generates the mosaic cellular pattern of the olfactory epithelium. *J Cell Biol* *212*, 561-  
742 575.

743 Kim, H.Y., and Davidson, L.A. (2013). Investigating morphogenesis in *Xenopus*  
744 embryos: imaging strategies, processing, and analysis. *Cold Spring Harb Protoc* *2013*,  
745 298-304.

746 Kinoshita, N., Hashimoto, Y., Yasue, N., Suzuki, M., Cristea, I.M., and Ueno, N. (2020).  
747 Mechanical Stress Regulates Epithelial Tissue Integrity and Stiffness through the  
748 FGFR/Erk2 Signaling Pathway during Embryogenesis. *Cell Rep* *30*, 3875-3888.

749 Konno, D., Shioi, G., Shitamukai, A., Mori, A., Kiyonari, H., Miyata, T., and Matsuzaki,  
750 F. (2008). Neuroepithelial progenitors undergo LGN-dependent planar divisions to  
751 maintain self-renewability during mammalian neurogenesis. *Nat Cell Biol* *10*, 93-101.

752 Leonavicius, K., Royer, C., Preece, C., Davies, B., Biggins, J.S., and Srinivas, S. (2018).  
753 Mechanics of mouse blastocyst hatching revealed by a hydrogel-based microdeformation  
754 assay. *Proc Natl Acad Sci U S A* *115*, 10375-10380.

755 Li, P., Banjade, S., Cheng, H.C., Kim, S., Chen, B., Guo, L., Llaguno, M., Hollingsworth,  
756 J.V., King, D.S., Banani, S.F., *et al.* (2012). Phase transitions in the assembly of  
757 multivalent signalling proteins. *Nature* *483*, 336-340.

758 Mimori-Kiyosue, Y., Matsui, C., Sasaki, H., and Tsukita, S. (2007). Adenomatous  
759 polyposis coli (APC) protein regulates epithelial cell migration and morphogenesis via  
760 PDZ domain-based interactions with plasma membranes. *Genes Cells* *12*, 219-233.

761 Murray, D.T., Kato, M., Lin, Y., Thurber, K.R., Hung, I., McKnight, S.L., and Tycko, R.  
762 (2017). Structure of FUS Protein Fibrils and Its Relevance to Self-Assembly and Phase  
763 Separation of Low-Complexity Domains. *Cell* *171*, 615-627.

764 Paolini, A., and Abdelilah-Seyfried, S. (2018). The mechanobiology of zebrafish cardiac  
765 valve leaflet formation. *Curr Opin Cell Biol* *55*, 52-58.

766 Ren, Y., Li, R., Zheng, Y., and Busch, H. (1998). Cloning and characterization of GEF-  
767 H1, a microtubule-associated guanine nucleotide exchange factor for Rac and Rho  
768 GTPases. *J Biol Chem* *273*, 34954-34960.

769 Schwyer, C., Shamipour, S., Pranjic-Ferscha, K., Schauer, A., Balda, M., Tada, M.,  
770 Matter, K., and Heisenberg, C.P. (2019). Mechanosensation of Tight Junctions Depends

771 on ZO-1 Phase Separation and Flow. *Cell* *179*, 937-952.  
772 Shiina, N. (2019). Liquid- and solid-like RNA granules form through specific scaffold  
773 proteins and combine into biphasic granules. *J Biol Chem* *294*, 3532-3548.  
774 Teng, X., Qin, L., Le Borgne, R., and Toyama, Y. (2017). Remodeling of adhesion and  
775 modulation of mechanical tensile forces during apoptosis in *Drosophila* epithelium.  
776 *Development* *144*, 95-105.  
777 Thompson, D.W. (1917). *On Growth and Form* (Cambridge Univ. Press).  
778 Wegmann, S., Eftekharzadeh, B., Tepper, K., Zoltowska, K.M., Bennett, R.E., Dujardin,  
779 S., Laskowski, P.R., MacKenzie, D., Kamath, T., Commins, C., *et al.* (2018). Tau protein  
780 liquid-liquid phase separation can initiate tau aggregation. *The EMBO journal* *37*, e98049.  
781

# Kinoshita et al. Figure 1

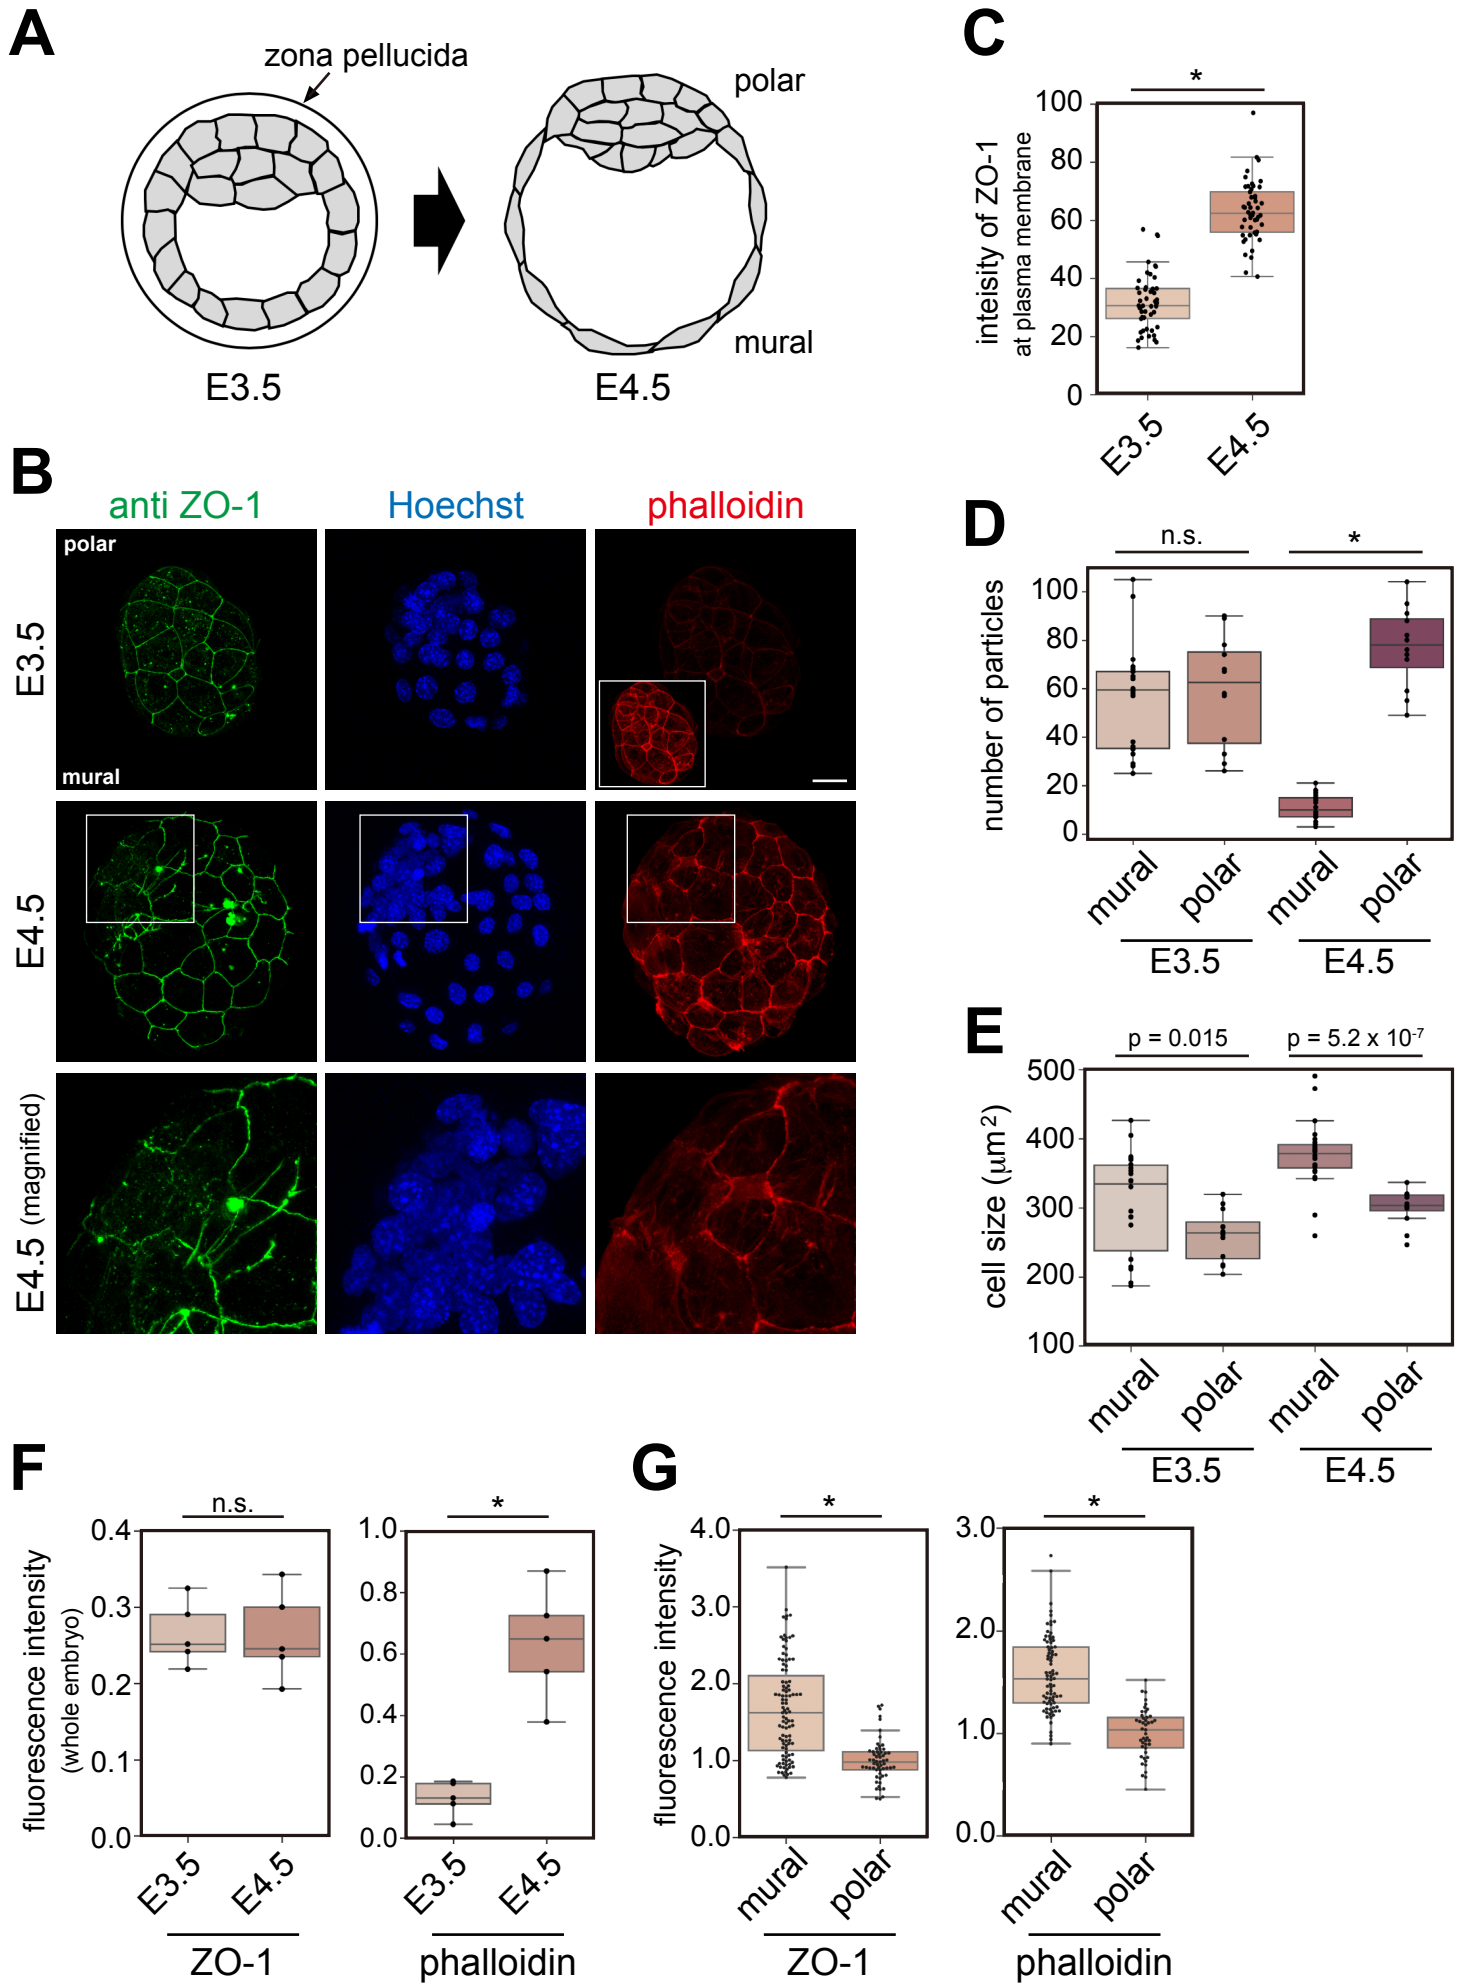

# Kinoshita et al. Figure 2

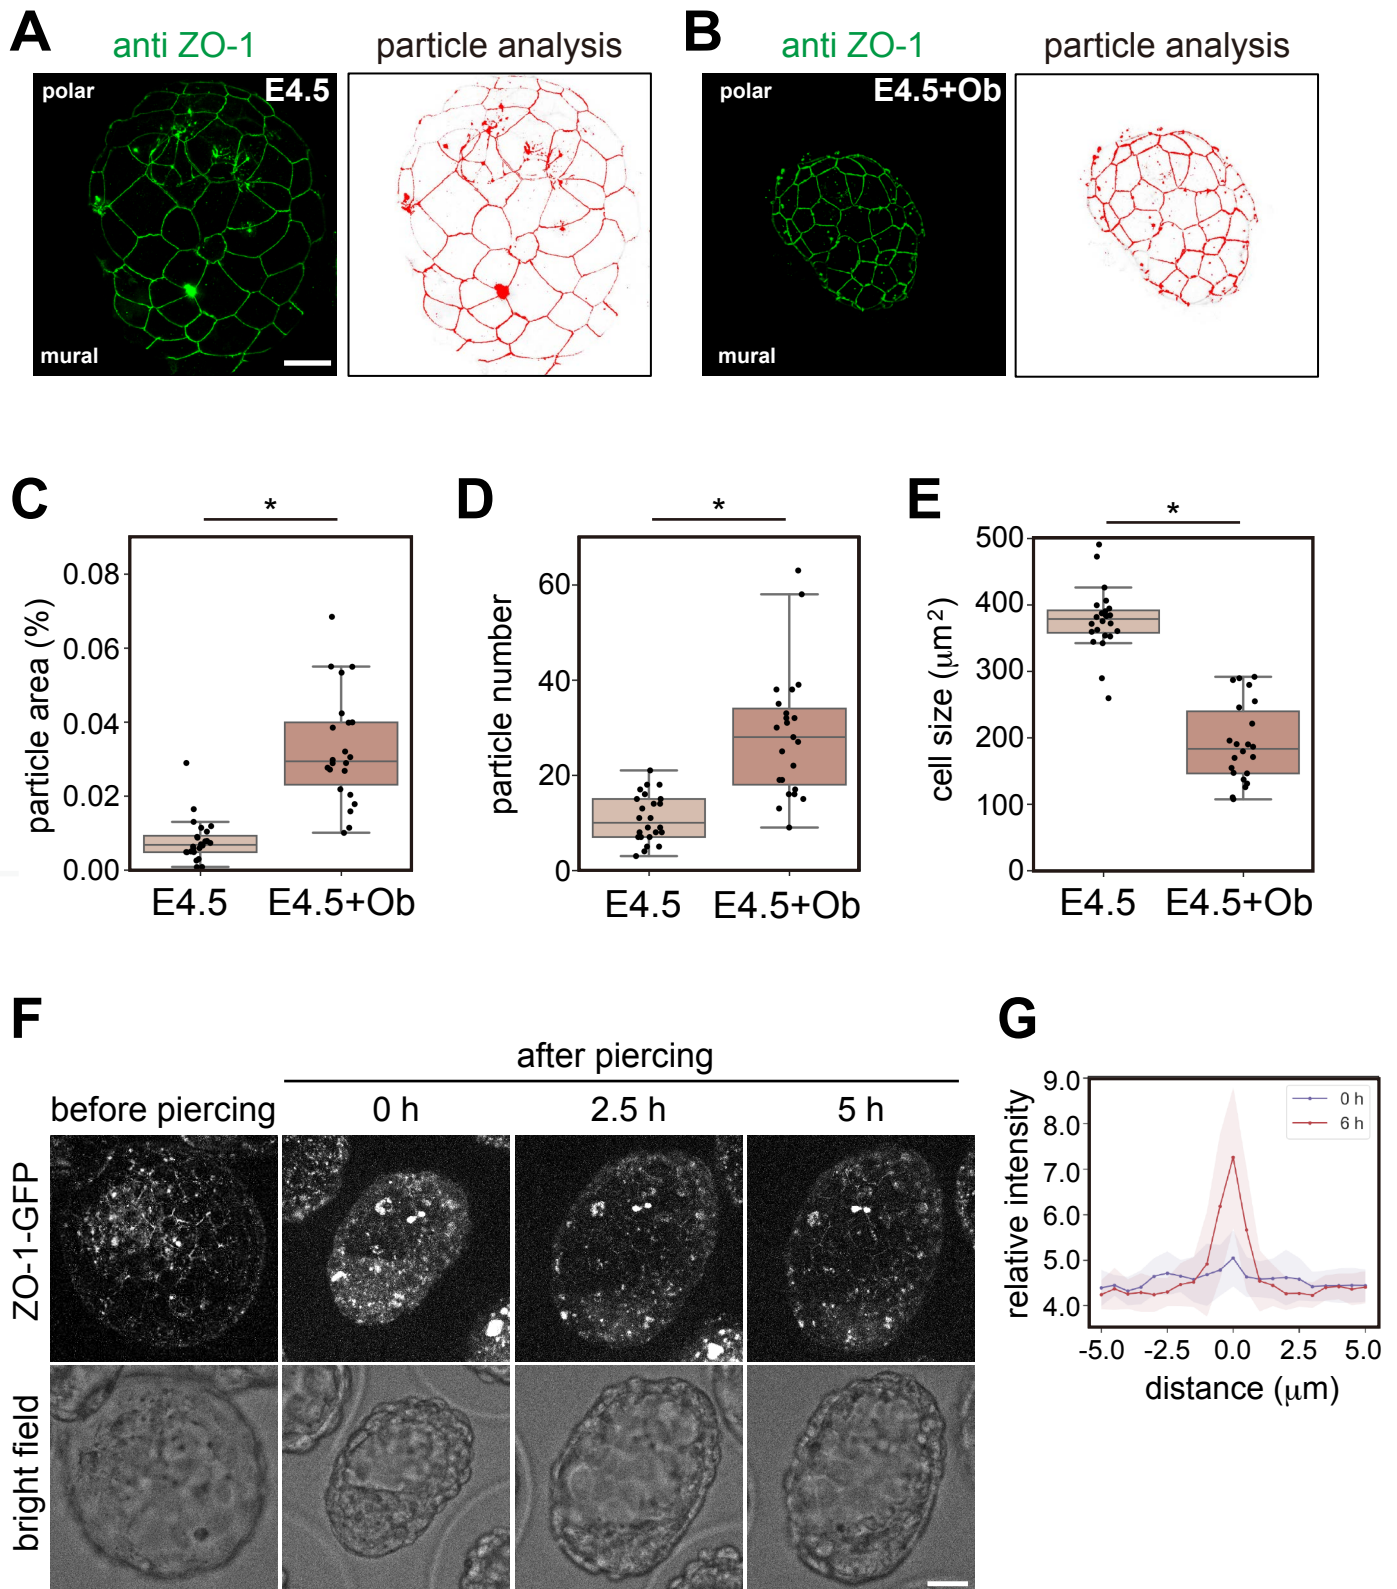

# Kinoshita et al. Figure 3

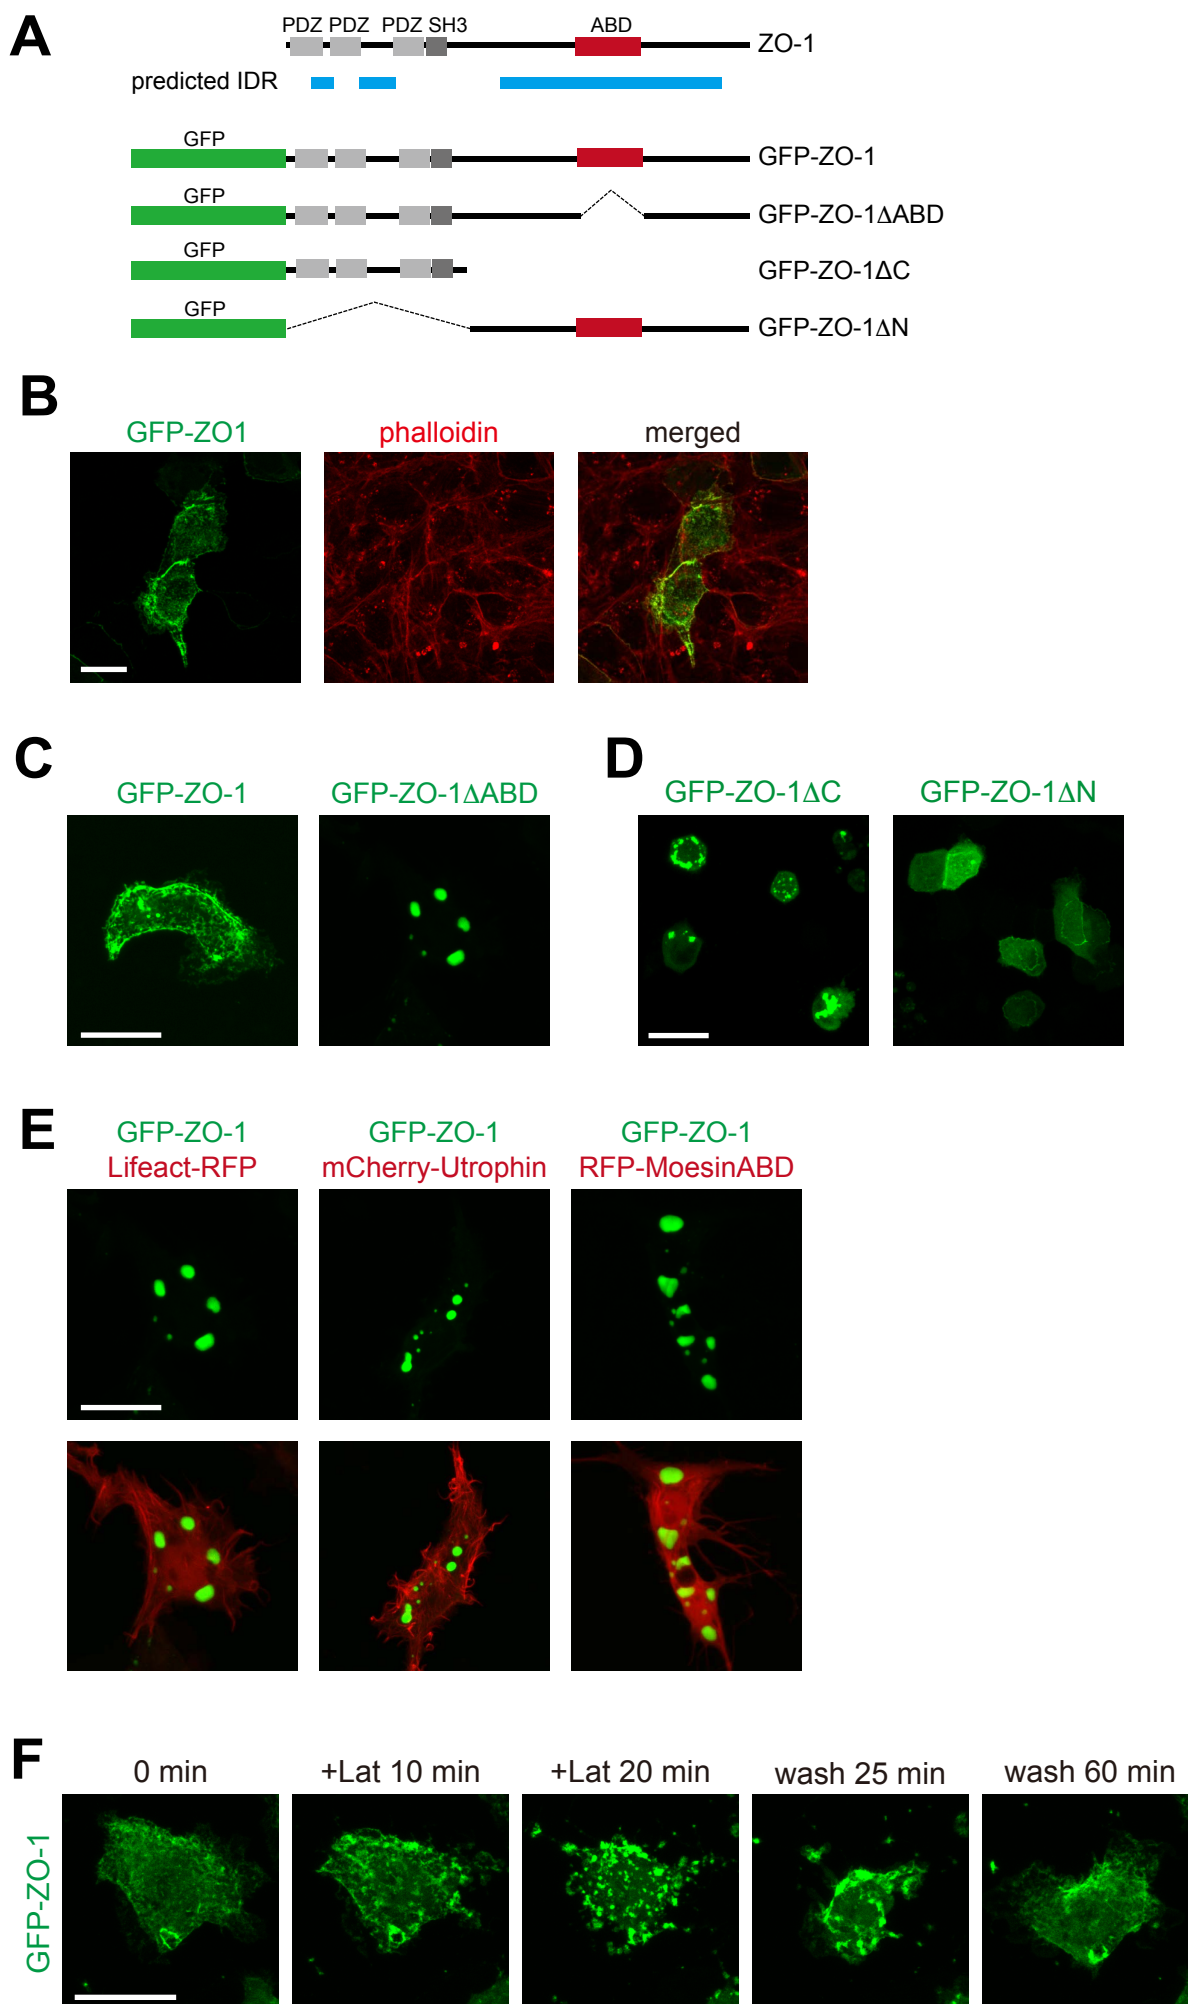

# Kinoshita et al. Figure 4

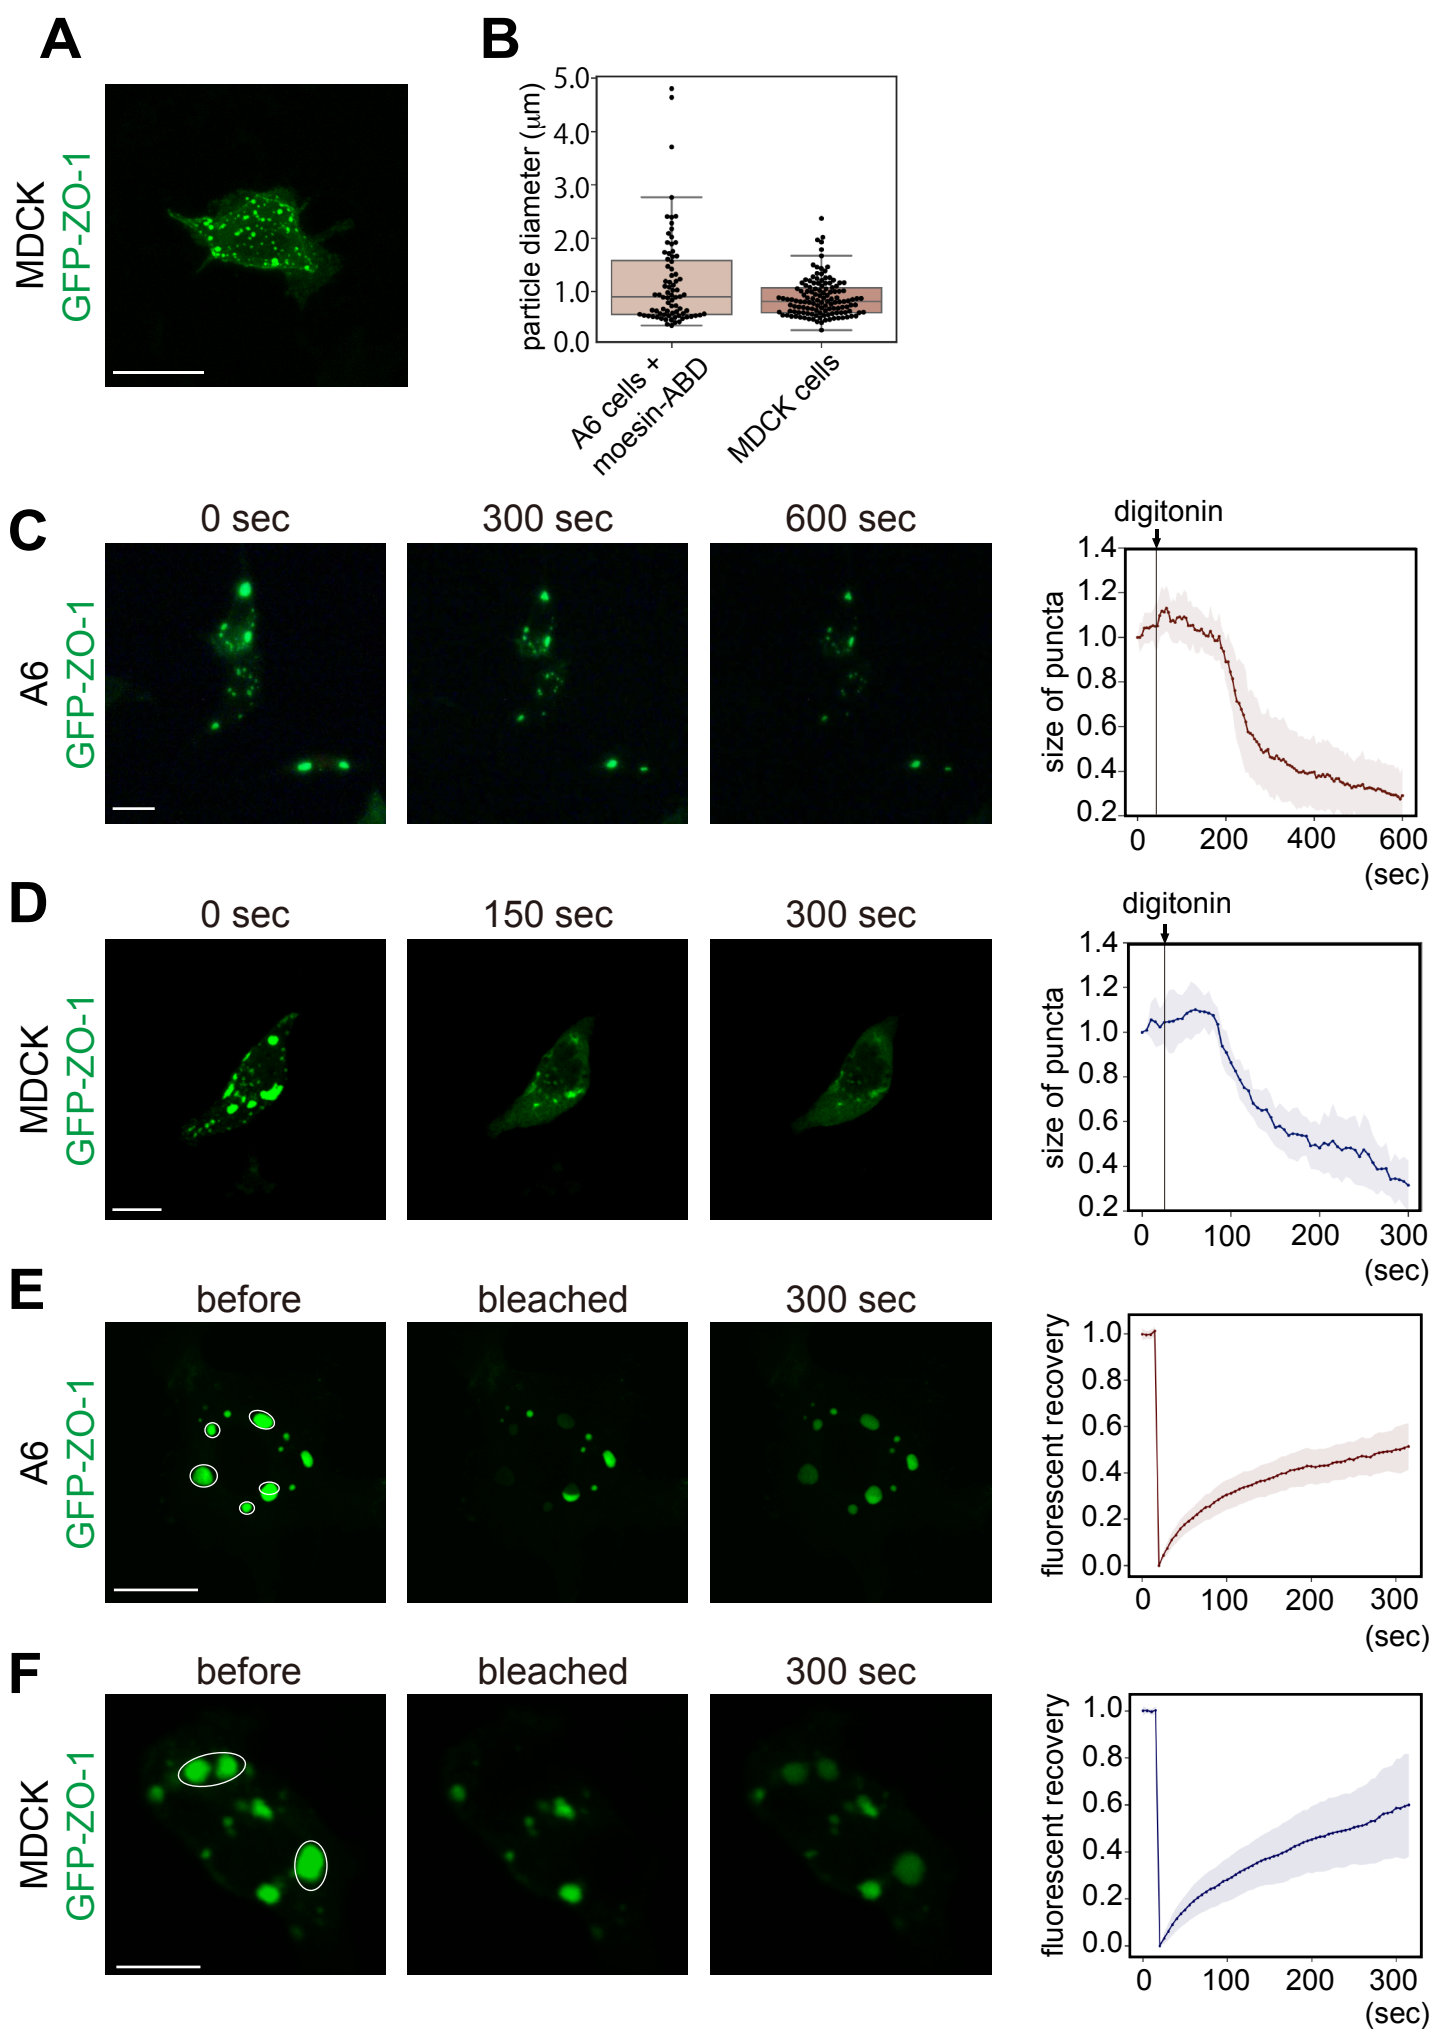



# Kinoshita et al. Figure 5

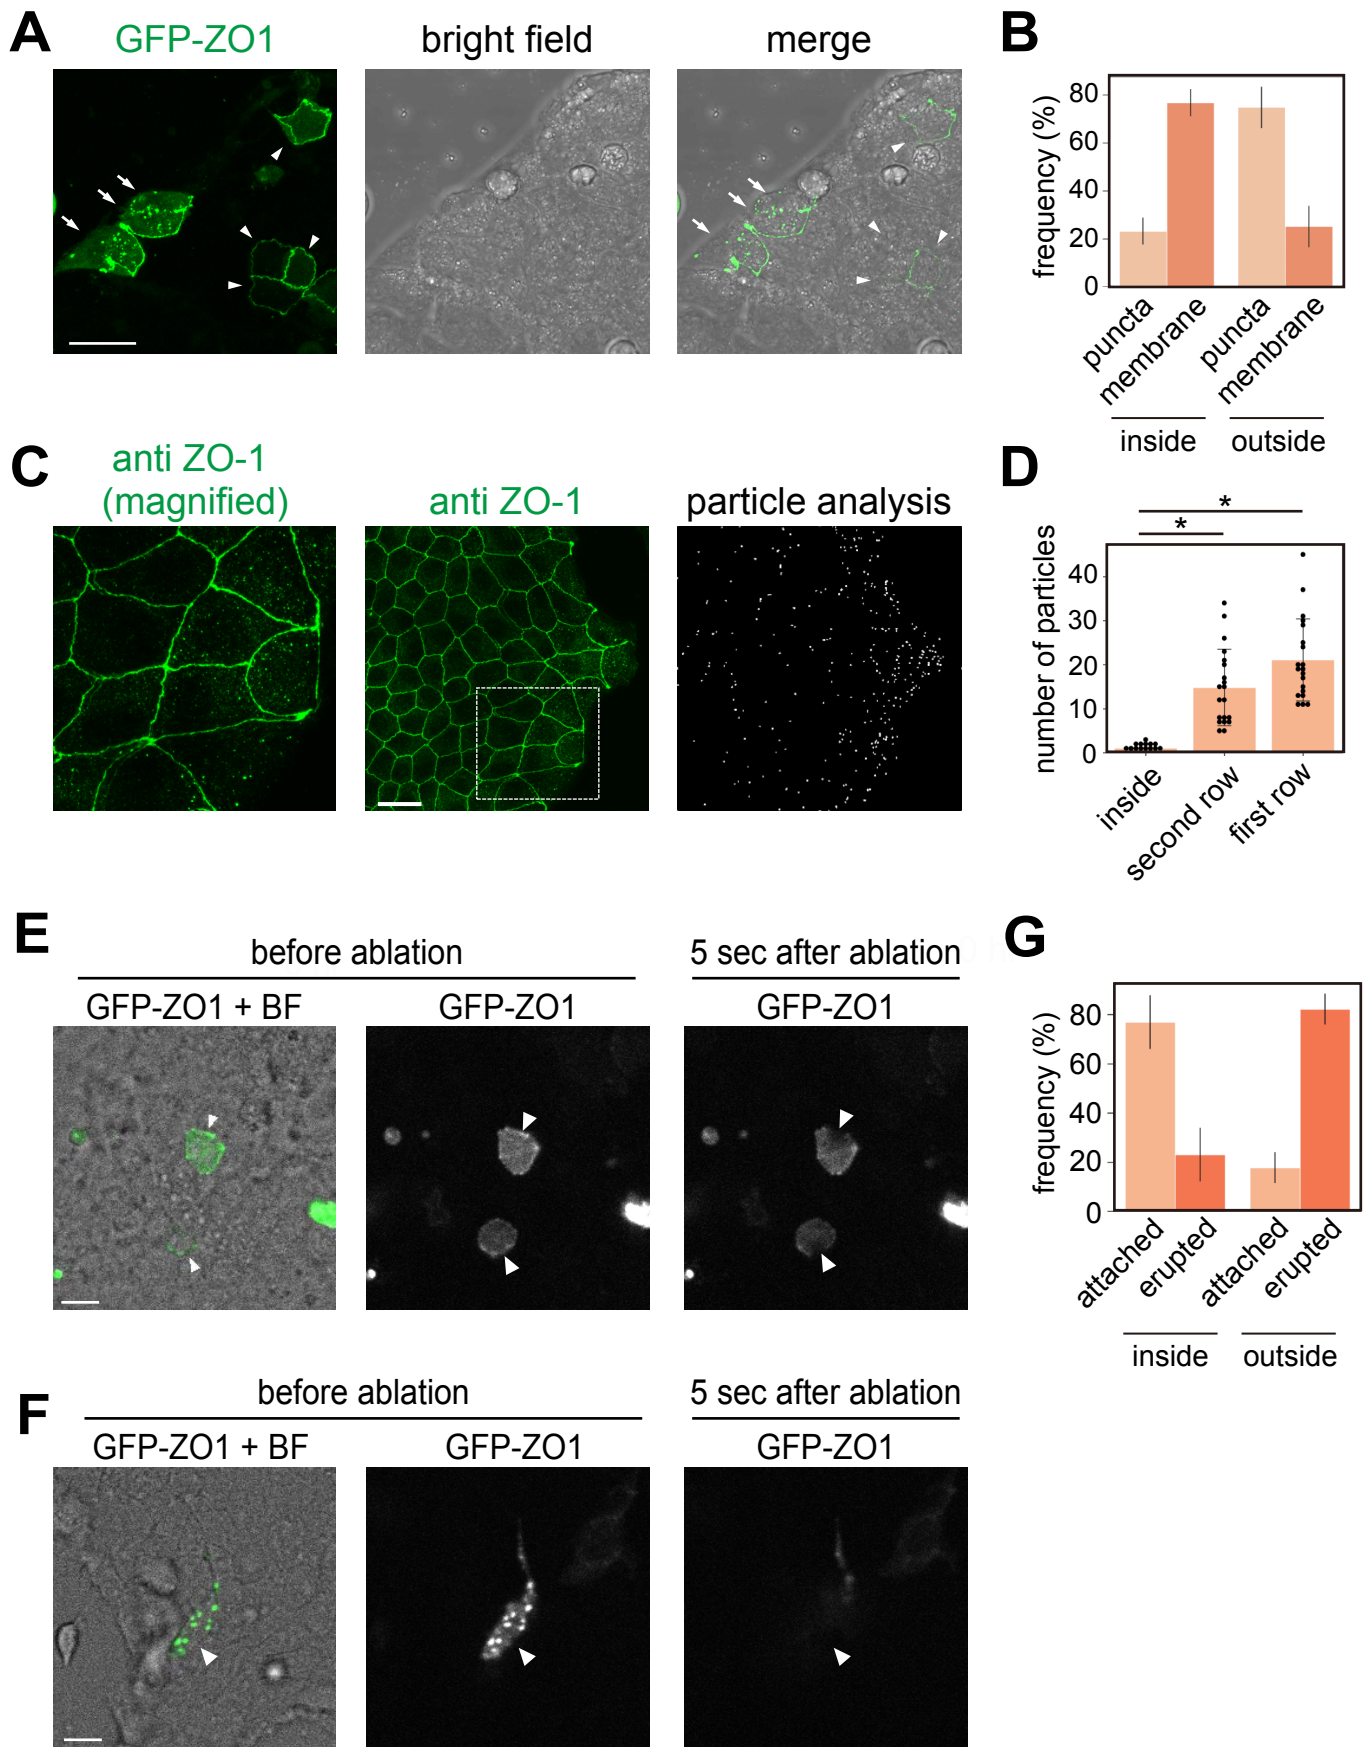

# Kinoshita et al. Figure 6

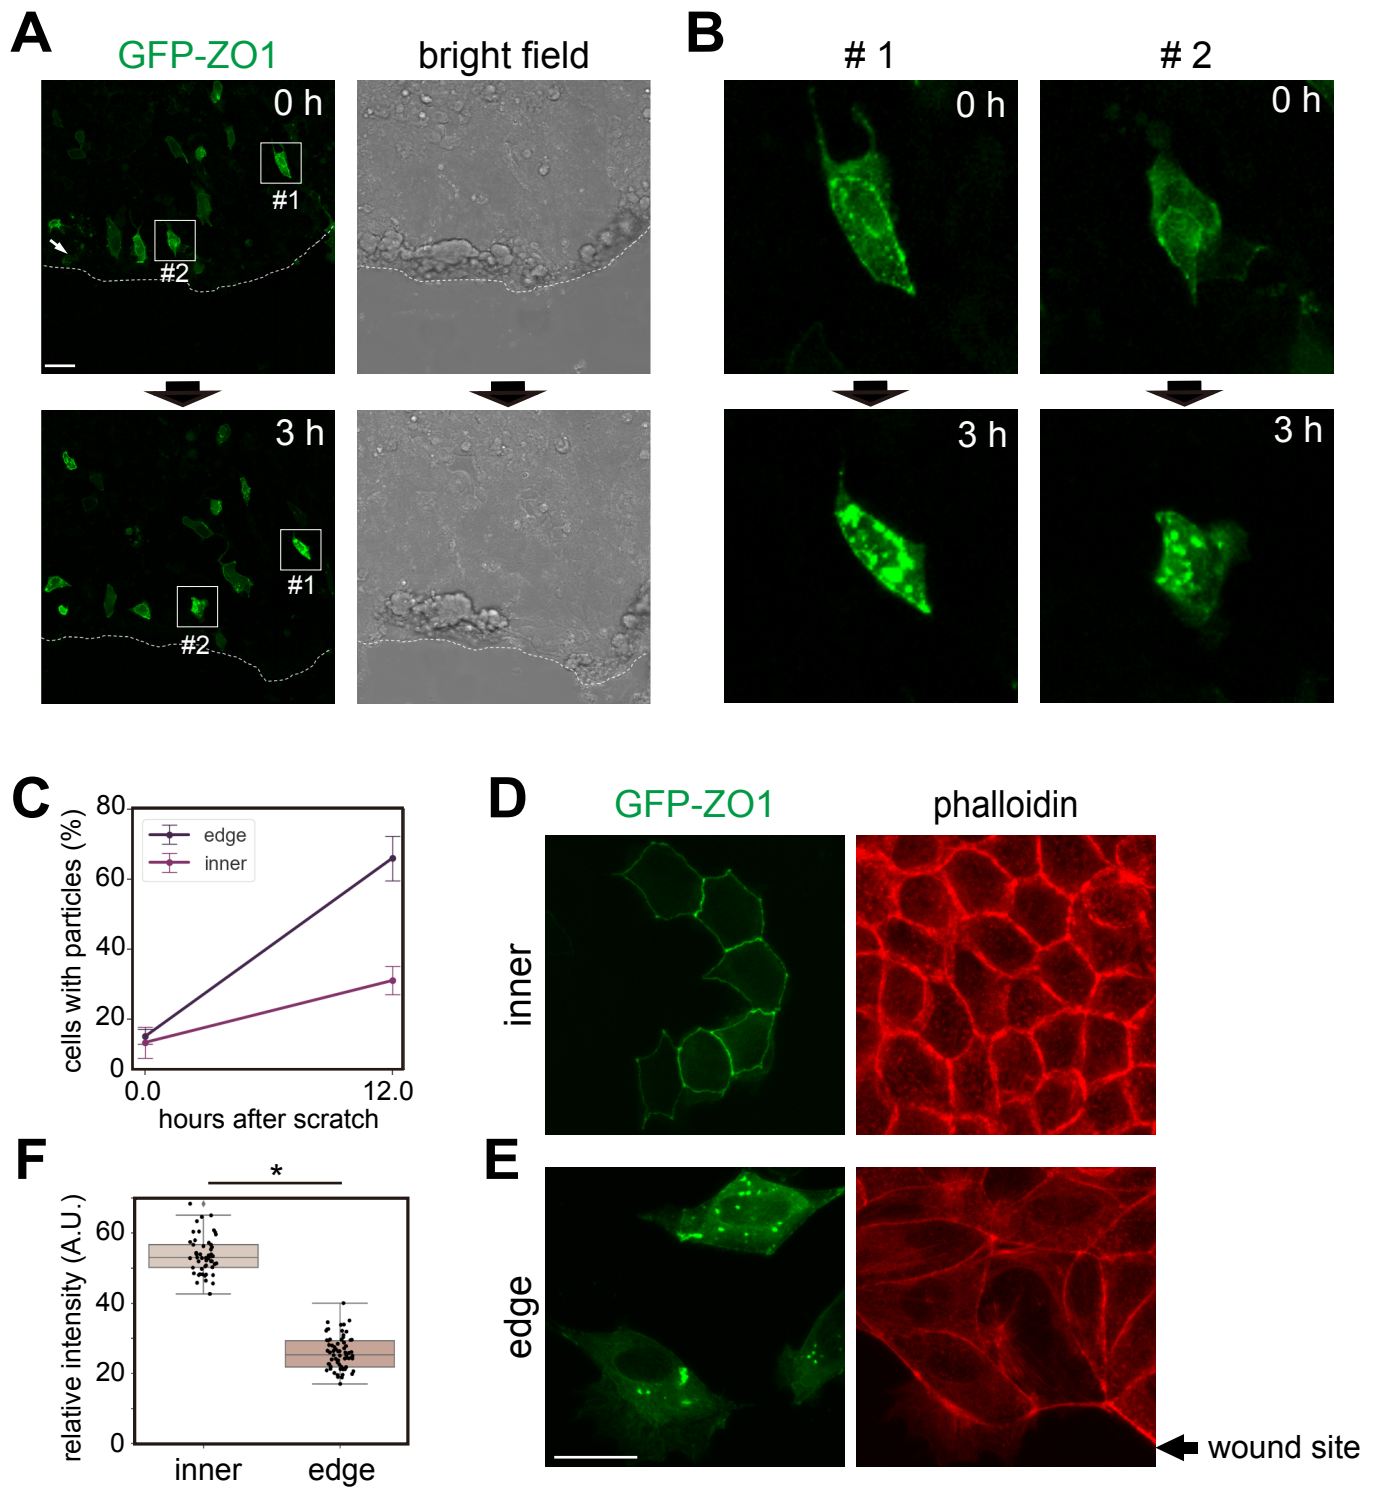

# Kinoshita et al. Figure S1

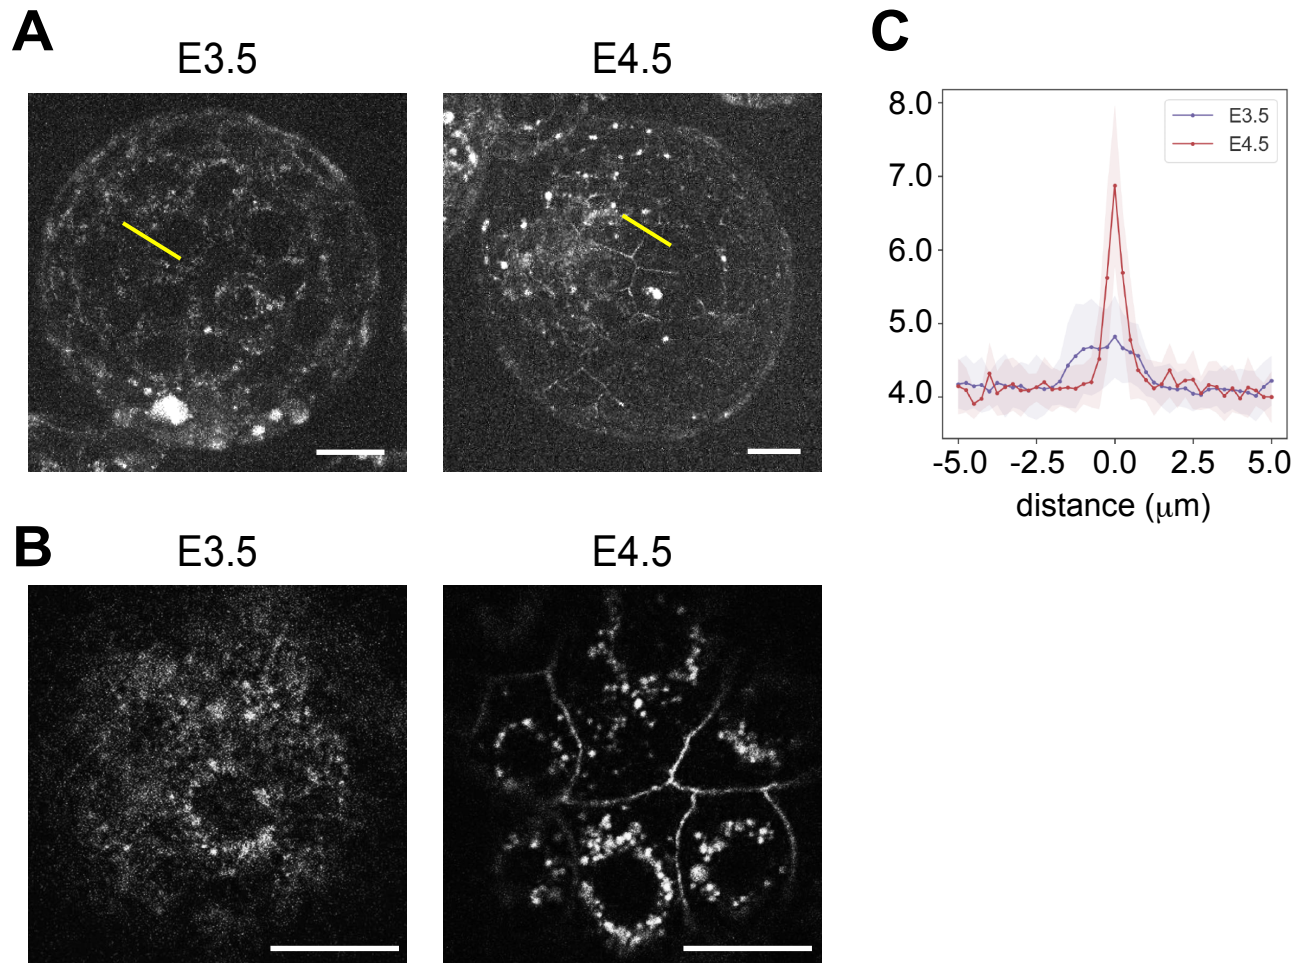

# Kinoshita et al. Figure S2

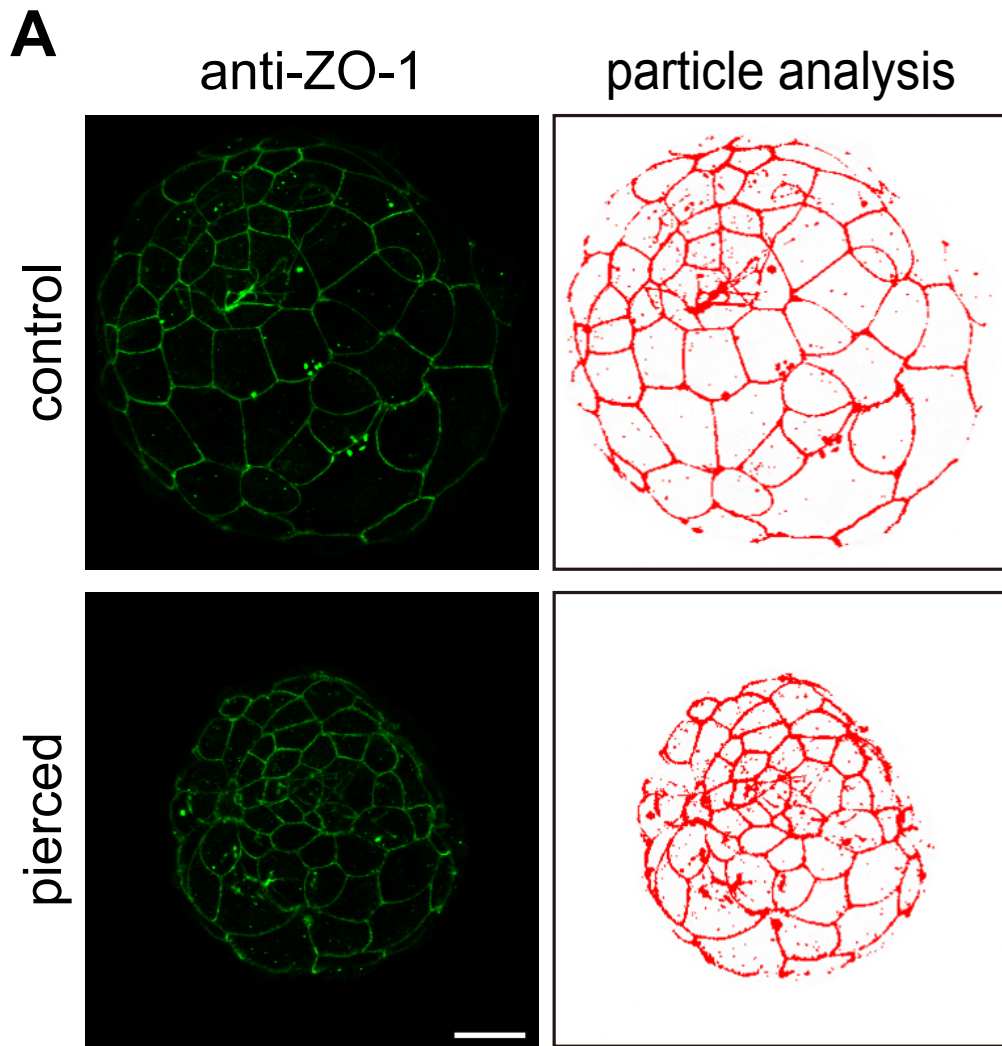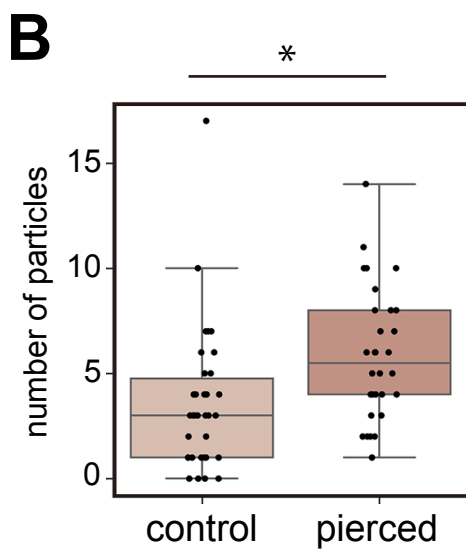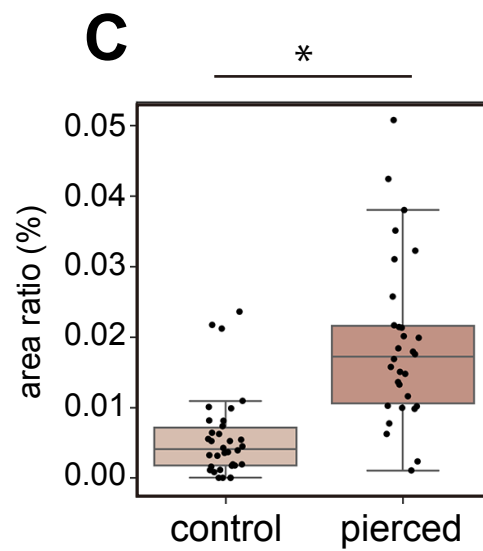

# Kinoshita et al. Figure S3

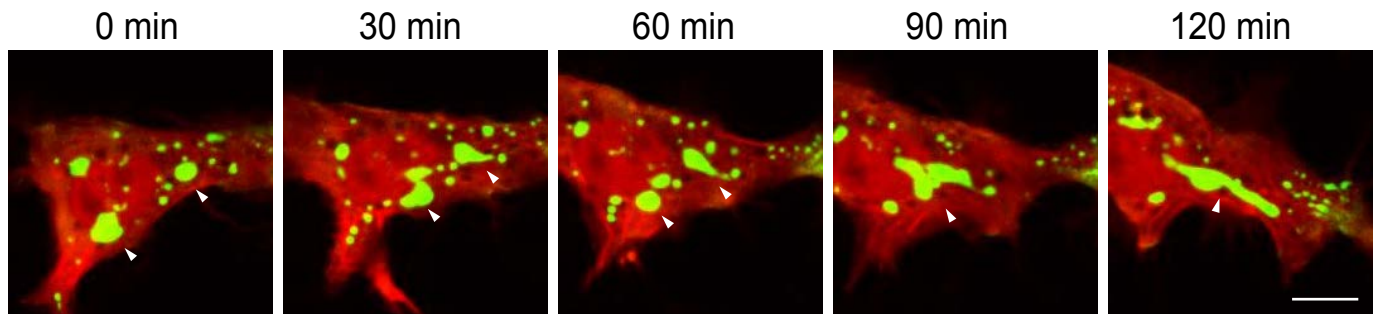

## trypsin-EDTA treatment

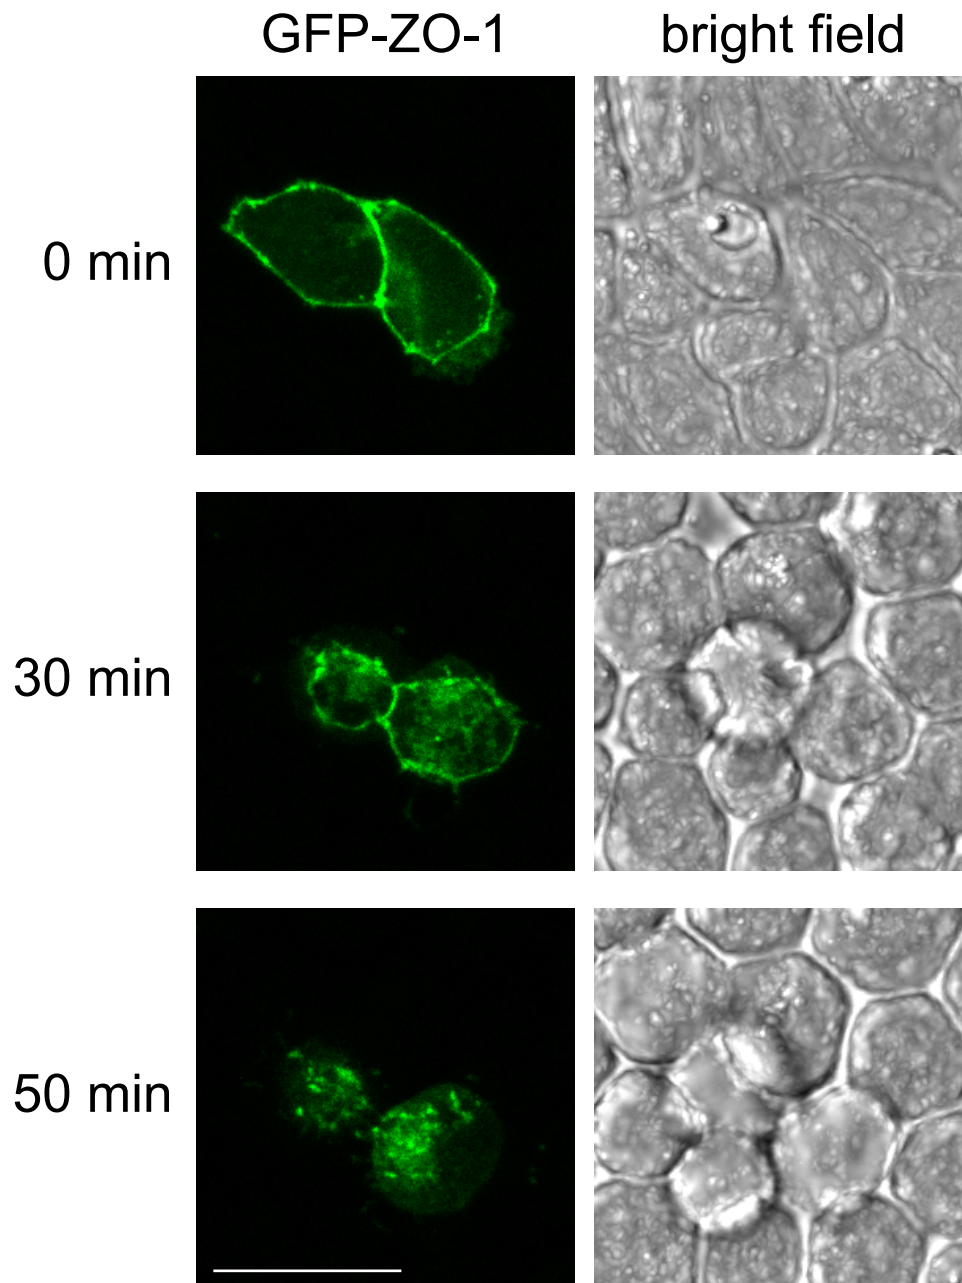

# Kinoshita et al. Figure S5

**A**

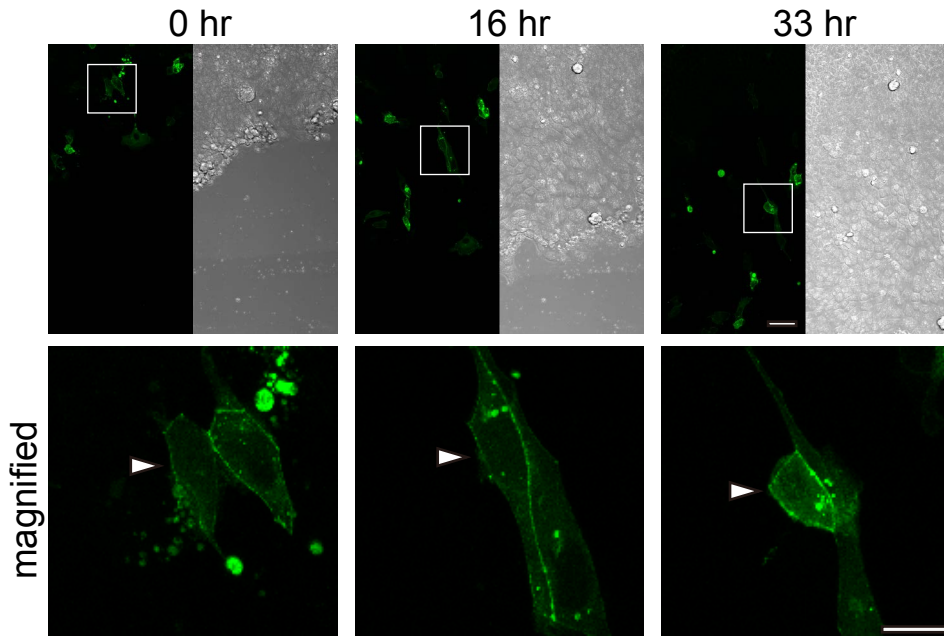

**B**

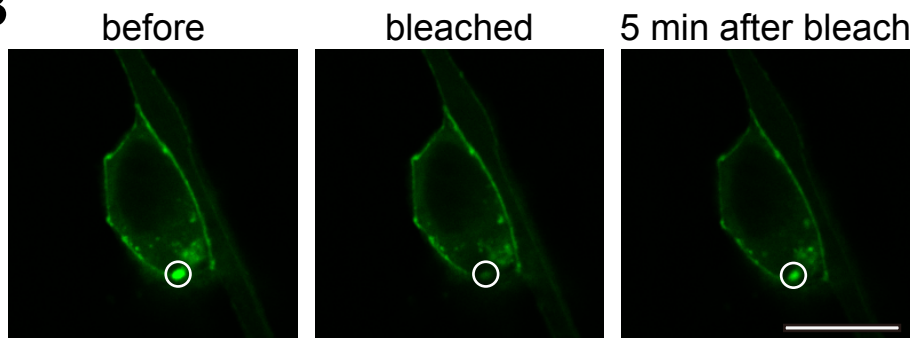

**C**

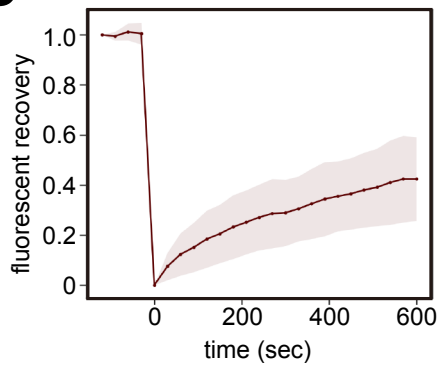

**D**

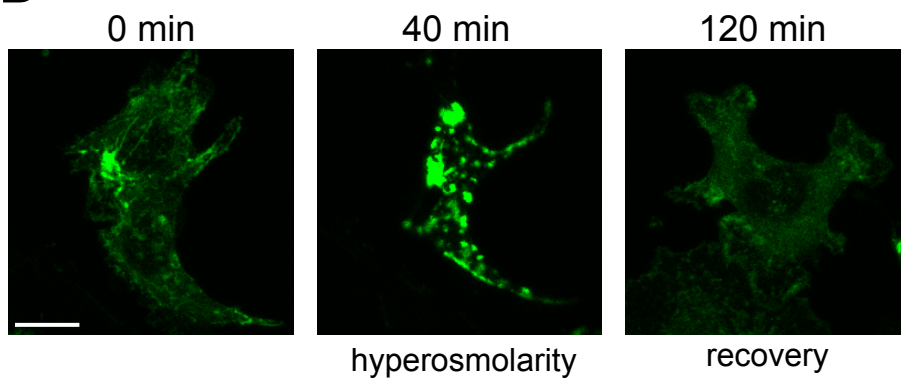

Source: https://biorxiv.org/content/10.1101/2020.10.04.323436v1.full.pdf
